# Supplementary material for: Elucidation of the noncovalent interactions driving enzyme activity guides branching enzyme engineering for α-glucan modification
Source: Springer Nature journal article supplement (doi:10.1038/s41467-024-53018-6), 2024-10-09
Supplement: MOESM4 [file 41467_2024_53018_MOESM4_ESM.pdf]

**RpBE** .....  
**BfBE** .....  
**MbBE** MNARAHDNVNLNIEPEALAAALQRVEHYNPHGLLGSHPVPEAFG.....GGVLVRSFHPDA  
**ThBE** .....MTDALFAEIDRLVAGHHNPHGLLGAHPGPDGITVVRALRPLAWSVHALLADG  
**TeBE** .....MTVSPEQIDRIVSNQHHDPPFEILGCHQIQON.....GQSVWAVRAYLPNA  
**LnBE** .....MLLSPEELRSLVEFRHATPHDLLGMHVLGDR.....RGV..VVRALIPGA  
**RoBE** .....  
**TaBE** .....  
**CbBE** .....  
**DaBE** .....  
**HhBE** .....  
**AaBE** .....

**RpBE** .....  
**BfBE** .....MSQ  
**MbBE** EGCDDVLEGGESRP...MQ.PLGGGVFGLHLPDRALPLSYRLRFSFPGGTTWELVDPYRF  
**ThBE** .....HLHNGVFAGTVPGTQIPDYRLAVRYSADGEEIVVDDPYRH  
**TeBE** ERVSVLCPEQ..RQEYPMTPVHHPHFFFECHIP.VAELNNYQLKIYENGHERVIYDPYAFR  
**LnBE** VQVEAVPVHEPHQPRIRLQRIHEVGLFEGVSSAEHRVYAYDLVITDEQGRVTRTRDPYSF  
**RoBE** .....MRPSQEDSERKGRVVRPKAEAPP  
**TaBE** .....  
**CbBE** .....MSNSETLSGR  
**DaBE** .....SDGVVE  
**HhBE** .....MN  
**AaBE** .....MKK

1            10            20            30            40            50  
**RpBE** MSW L T E E D I R R W E S G T F Y D S Y R K L G A H P D E E . . . . . G T W F C V W A P H A D A V S V I G A F N  
**BfBE** K V F I S E D D E Y L F G G G T H Y D I Y D K L G A H P S E E . . . . . K G K K G F F F A V W A P N A A D V H V V G D F N  
**MbBE** L P T V G E L D L Y L F G G E G T H R R L W Q A L G A R P M E L . . . . . D G V R G T A F T V W A P N A K R V S V V G A F N  
**ThBE** M P A L G D L D I H L L C E G R H E E M W R A L G A R T R R F A S V M G E V T G T V F A V W A P N A R G V R V I G D F N  
**TeBE** S P K L T D F D I H L F A E G N H H R I Y E K L G A H L L T V . . . . . D G V E G V Y F A V W A P N A R N V S V I G D F N  
**LnBE** L P T I G E M D L Y L F N K G D E R R I Y E K L G A Q V R E L . . . . . D G V P G V S F A V W A P H A Q R V S V V G D F N  
**RoBE** . S W L T E E D I R R W E S G T F Y D S Y R K L G A H P D D E . . . . . G T W F C V W A P H A D G V S V I G A F N  
**TaBE** T S S L S D L D L Y L F N E G T H F R L Y E K L G A H P A G P . . . . . H P S N G T R F A V W A P N A E A V S V I G E C N  
**CbBE** T G L L T K D D L Y L F N Q G R H Y R L Y N K L G A H L V S T . . . . . D D G E G A V F A V W A P N A R E V S V I G D F N  
**DaBE** Y S L I T D Y D V Y L F K E G K H Y R I Y E K L G A H P L V V . . . . . D G V S G V Y F A V W A P N A E A V H V V G D F N  
**HhBE** F S M I S D Y D V Y L F K E G T H C K L Y E K L G A H L F E E . . . . . G V Y F A V W A P N A T Y V S V V G S E N  
**AaBE** F S L I S D Y D V Y L F K E G T H R L Y D K L G S H V I E L . . . . . N G K R Y T F F A V W A P H A D Y V S L I G D F N

60            70            80            90            100  
**RpBE** N W D P E A H Q L E R . . Y G A G L W A G Y V P G A L P G H A Y K Y R I R H . . G F Y Q A D K T D P Y A F A M E P P T G  
**BfBE** G W D E N A H Q M K R S . K T G N I W T L F I P G V A I G A L Y K F L I T A Q . D G R K L Y K A D P Y A N Y A E L R P G  
**MbBE** N W D G R L M P M R S L . G S S G V W E L F V P G V G A G E L Y K Y E I K T Q . M G D L R V K T D P M A R R M E C P P Q  
**ThBE** H W D G T G H P M R S L . G S C G V W E L F V P G V G D G T R Y K Y Q V L G A . D G V W R E K A D P M A F A A Q V P P E  
**TeBE** H W D G R K H Q M A R R . . G N G I W E L F I P G L S V G E R Y K Y E I K N Q . E G H I Y E K S D P Y G F Y Q E P R P K  
**LnBE** Q W D G R R H P M R R L . G A S G V W E I F I P G V R P G A L Y K Y E I R N V . H G Q I T L K T D P Y G F F F E V P P R  
**RoBE** D W N P D A N P L E R . . Y G G G L W A G Y V P G A R P G H T Y K Y R I R H . . G F Y Q A D K T D P Y A F A M E P P T G  
**TaBE** D W T P G A D V L H P R . E Q S G I F E G V P S A R P G E L E K F Q I R S R F G G Y E V D K A D P F A F A R T E L P P G  
**CbBE** G W N I N A H P L E L R . G K S G I W E G F I P G V R K G S L Y K Y H I E S N Y N D Y K V D K A D P Y A F A E N P P G  
**DaBE** D W K P G T H K L I P R K D S S G I W E G F V G G A R V G D R Y K Y Y I V S K F G N Y R A F K G D P Y A F L W E V P P K  
**HhBE** N W D R G A N P L R K R E D A S G I W E G F V K G A R A G D L Y K Y F V V S K . S G Y T A E K S D P F G F L F E V P P K  
**AaBE** E W D K G S T P M V K R E D G S G I W E V L L E G D L T G S K Y K Y F L K . N . G N Y E V D K S D P F A F F C E Q P P G

110            120            130            140            150  
**RpBE** S P I E G L A S I I T R L . D Y T W H D A W M Q R R K G P A S L Y E P V S I Y E V H L G S W R H K Q . P . . . . .  
**BfBE** . . . . . N A S R T T D L S G F K W S D S K W Y E S L K G K D M N R Q P I A I Y E C H I G S W M K H P D G T . . . . .  
**MbBE** . . . . . T A S I V F E T . H Y E W G D R A W M E D R A K R D I T R E P V H I Y E L H L G S W A R V P E D G . . . . .  
**ThBE** . . . . . T A S V V F T S . R H E W H D D T W L A E R K I A D P T R Q P M S V Y E V H L G S W R P . . . . .  
**TeBE** . . . . . T A S I V T D L N S Y E W G D S D W L E K R R H T D P L N Q P I S V Y E V H L G S W L H A S M E D P P I G A D  
**LnBE** . . . . . N A A I V W D P R S Y S W G D D A W L A R R A Q Q D P L R S P M S I Y E V H L G S W R K K S . P . . . . .  
**RoBE** S P I E G L A S I I T R L . D Y T W H D D E W M R R R K G P A S L Y E P V S I Y E V H L G S W R H K R . . P . . . . .  
**TaBE** . . . . . T A S Y V W D P . Q H H W R D A E W M A G R G R R S D R D A P L A I Y E V H L G S W R R V P E E . . . . .  
**CbBE** . . . . . T A S I V W N L . D Y N W S D Q S W L V K R N N A N S L K S P I S I Y E V H L G S W R R V P E E N . . . . .  
**DaBE** . . . . . T A S V V W D L . S Y E W R D D E W L R V R V L R N S Y E A P V S I Y E V H L G S W M R V P E E G . . . . .  
**HhBE** . . . . . T A S V V W D L . S Y T W N D H V W M Q N R Y L S N S L N A P W L I Y E V H L G S W K K K . . G . . . . .  
**AaBE** . . . . . N A S V V W K L . N Y R W N D S E Y M K K R K R V N S H D S P L I S I Y E V H V G S W R R V P E E G . . . . .

160 170 180 190 200  
RpBE ... . . . . . GVSF SYREI AEP LADYV QD LGFTHVE L LPIMEHPFY GSWGYQVVG  
BfBE ... . . . . . EDGFY TYRQFA DR IVEY LKEMKYTHVE L LGIAEHPFD GSWGYQVTG  
MbBE ... . . . . . YRSM SYREI APR LVEHVKK LGFTHVE L MPLAEHAFY PSWGYQVTG  
ThBE ... . . . . . GL SYREI ADQ LVDYVSETG FTHVE F LPVAEHPFG GSWGYQVTS  
TeBE GQPQEPVQA AELKPWARFL TYRELA AK LIPYVKE LGYTHVE L LPVAEHPFD GSWGYQVTG  
LnBE ... . . . . . TESP GYRELA GP LIDYLR RMGFTHVE F LPVAEHPFY PSWGYQVTG  
RoBE ... . . . . . GESF SYREI AEP LADYV QEMGFTHVE L LPVMEHPFY GSWGYQVVG  
TaBE ... . . . . . NRSL SYREI APR LVEHVTN LGFTHVE F LPLAEHAFY GSWGYEPTA  
CbBE ... . . . . . HRPL TYREI APR LAEYVSRMGFTHVE F LPVMEHPFS GSWGYQVTG  
DaBE ... . . . . . NRFL TYREI AVK LCDYVSYMGFTHVE F LPVMEHPFY GSWGYQVVG  
HhBE ... . . . . . WESL GYRELA QELVQYAKYMGFTHVE F LPVMEHPFY GSWGYQITG  
AaBE ... . . . . . NRFL SYREI A EY LPYVYKE MGFTHVE F LPVMEHPFY GSWGYQITG

210 220 230 240 250 260  
RpBE YYAPTFRVYCTPQDLMYLIDY LHQRCG IGVILDWVPSHFADPQG LVYFDGT L LFEYD D P RM  
BfBE YYAPTARVYCEPTDFMYLINQLHKHC IGVILDWVPAHFCEFG LACFDGT CIYED D P PRK  
MbBE YFSPTARVYCEPDDLKFEVDYCHRHC IGVILDWVPAHFCKDDFALRRFDCTALYEH D P TRR  
ThBE YYAPSSRFCEPDDFRHLVDR LHQAC IGVILDWVPAHFCKNEWALARFDCTALYEH D P RRR  
TeBE YYAPTSTRVYCTPQDFMYFVDQCHQNG IGVILDWVPSHFCKDGHGLAFDGTALYEH D P RRK  
LnBE YYAPTSTRVYCTPQDFQYLVDA LHEAC IGVILDWVPAHFPRDDWALARFDCTALYEH D P RRL  
RoBE YYAPTFRVYCTPQDLMYLIDY LHQRCG IGVILDWVPSHFADPQG LVYFDGT L LFEYD D P KRM  
TaBE FFAPTARVYCEPEGLMELIDTLHHC IGVILDWVPSHFADGHSLSYFDGTALYEH D P RRK  
CbBE YFAPTSTRVYCTPQDFMYLIDY LHRVY IGVILDWVPSHFCKDEHGLGF DGTALYEH D P HRR  
DaBE YYAPTSTRVYCTPQDFMYLVERLHECC IGVILDWVPSHFATDEHGLAFYDGTALYEH D P WRK  
HhBE YFAPTSTRVYCTPQDFMYLIDR LHQEC IGVILDWVPSHFPTDGHALAYFDGTALYEH D P YRK  
AaBE YFAPTSTRVYCTPQDFMYLIDK LHQEC IGVILDWVPSHFPTDAHGLAYFDGTALYEH D P WRK

270 280 290 300 310 320  
RpBE RHHPDWGTYVFDY NKPGV RNFLI SNALFWLDY YHVDGLRVD AVASMLYRDY SRK . . EWT P  
BfBE GEHPDWGTKIFNLAKPEVKNFLI ANALYWRKEHIDGLRVD AVASMLYLDY GKKD GOWVP  
MbBE GEHPDWGTLIFNYGRREVRSFLI ANALYWLNEE HIDGLRVD AVASMLYLDY SRE GOWVP  
ThBE GEHPDWGTLIFNYGRTEV RNFLI ANALFWLEEB HIDGLRVD AVASMLYLDY SREP GOWEP  
TeBE GEHKKEWGLIFNYGRHEV RNFLV ANALFWFDKYHIDGIRVD AVASMLYLDY GRKE GEWIP  
LnBE GAHQDWGTLIFNYGRNEV RNFLV ANALFWCDRYHADGLRVD AVASMLYLDY SRKP GEWIP  
RoBE RYHPDWGTYVFDY NKPGV RNFLI SNALFWLEKYHVDGLRVD AVASMLYRDY SRK . . EWT P  
TaBE GWHPDWHTMLFNYDRNEV RFLGSSAVFWLDRYHADGLRVD AVASMLYLDY SRRP GEWIP  
CbBE GYHPDWDSSTIFNYGRNEV AAFLI SNALFWLDKYHVDALRVD AVASMLYLDY SRKP GEWIP  
DaBE RVHPDWGSSYIFDYSKGEVKSFLI SNALFWIEKYHVDGLRVD AVASMLYLDY SRKP GEWIP  
HhBE RHHPDWGSSYIFDYSKPEVRSFLLS SAHFWLEKYHADAIRVD AVASMLYLDY SRKP GEWTP  
AaBE RWHPDWN S FVFDY GKP EVRSFLLS SAHFWLDKYHADGLRVD AVASMLYLDY SRK . . EWP

330 340 350 360 370 380  
RpBE NIFGGRENLEAIDFIKRFNETVYLHFPEAITIAEESTAWPGVSAPTYNNGLGF LYKWNMG  
BfBE NKYGDNK NLD AIEFFKHFNSVVRGTYPNILITIAEESTAWPKVTAPPEEDGLGF AFKWNMG  
MbBE NAYGGRENLEAIDFLRAMNIAVREAPGAFTVAEESTAWG ITRPPEAGLGF TFKWNMG  
ThBE NAYGGRENLEAIDFLKELNATA YRRNPGITMIAEESTAWPGVTRPTDTGLGF GKWNMG  
TeBE NEYGGRENLEAANFLRQVNHVIFSYFPGILSIAEESTAWPMVSWPTYMG LGF NLKWNMG  
LnBE NRYGGRENLEAIDFLRHTNEVVPATFPGVVTIAEESTAWPMVTRPPHVGLGF TFKWNMG  
RoBE NIFGGRENLEAIDFLKRFNETVYLHFPEAMTIAEESTAWPGVSAPTYNNGLGF LYKWNMG  
TaBE NVN GGRENLD TIRFLRWLNETVYRVVPGTQMPAEESTAWPDVSHPTSMGLGF GYKWNMG  
CbBE NOYGGKENLEALAFKRLNEEIYRNYPDVQITIAEESTAWPMVSRPTYVGLGF GMKWNMG  
DaBE NAYGGRENLEAIEFIKRFNEAIHKYHPGVLTI AEDSSAWPKVSRPVSEGLGF DMKWNMG  
HhBE NIYGGRENLEAIEFIKRLNECLYRDFPD TQITIAEESTAWPMVTRPTYVGLGF GMKWNMG  
AaBE NIYGGKENLEAIEFLRKFNE SVYRNF PDVQITIAEESTAWPMVSRPTYVGLGF GMKWNMG

390 400 410 420 430 440  
RpBE WMHDTLDYMRDPIYRKYHHDLTFSLWYAFSEHYILPLSHDEVVHGKGS LWTKMPGD DW  
BfBE WMHDFCEYMKLDPYFRQGAHYMMTFAMSYNDSENYILPLSHDEVVHLKSMVEKMPGYKV  
MbBE WMHDTLGYFQKEPVHRKYHQDLTFAMLYEYTERFINS ISHDEVVHGKGS LIEKMPGDFW  
ThBE WMHDTLSYLRHDPVHRQYHNEITFSLVYAHSENYVLP LSHDEVVHGKGS LIGKMPGDEW  
TeBE WMHDMLDYFSMDPWF RQFHNNVTFSMYHHS ENFMLALSHDEVVHGKSHIIGKMPGDRW  
LnBE WMHDTLR YFHRDPIYRKYHQNELTFAMLYHHENF ILPLSHDEVVHGKGS LWKMPGD DW  
RoBE WMHDTLDYIRRDPIYRKYHDELTFSLWYAFSEHYVLP LSHDEVVHGKGS LWKMPGD DW  
TaBE WMQDTLQYFRHDPIDRKFHQDDLTFRMLYAFSENFVLP LSHDEVVY GKGS LLGRMPGD DW  
CbBE WMHDTLLYMSKDP IYRKYHNSLTFRMLYAFSENFVLP LSHDEVVHGKGS LIGKMPGDDF  
DaBE WMHDTLYYMSKDP IYRKYHHDILT FNWVYVYENFVNSLSHDEVVHGKKS L INKMPGD DW  
HhBE WMHDTLIFYSKDPIYRKYHHDKI TFSI WYAFSENFVLP LSHDEVVHGKGS L INKMPGD WW  
AaBE WMNDTLIFYSKDPIYRKYHHEVLTFSI WYAFSENFVLP LSHDEVVHGKGS L INKMPGD YW

|      |     |          |          |          |                 |                                    |
|------|-----|----------|----------|----------|-----------------|------------------------------------|
|      | 450 | 460      | 470      | 480      | 490             | 500                                |
| RpBE | QKA | ANLRLL   | YGHMWGHP | GKLLFMG  | GEFGQ           | HEWNNHDTQLBWHLLD.QPHYHRGIQAWVRD    |
| BfBE | DKY | ANLRVGYT | YMFHSG   | GKLLFMG  | QDFGQ           | EREWSKRELDWFLLE.NDNLNRGMKDYVVGK    |
| MbBE | QKL | ANLRLL   | LAYQVTRP | GKQLIFMG | TEIGOHGEWNV     | DGSVDWHLAD.HPQRQALLTFMAE           |
| ThBE | QRC | ANLRALL  | YMWAHG   | GKQLLFMG | DEIAOGDEWSD     | HAGVQWLLR.YPHHSQVRRRLVTD           |
| TeBE | QKF | ANLRC    | LFAFMYFT | HPGKKT   | MFMGMEFAOWSEWNV | WVSDLBWHLLO.YEPHQQIKRFFGD          |
| LnBE | QRA | ANLRALL  | YQWLFPG  | QLLFMG   | GEWQRT          | EWNANAAALDWAALAEQHPLHQGIQRLVAD     |
| RoBE | QKA | ANLRLL   | YGHMWGHP | GKLLFMG  | GEFGQ           | HEWNNHDTQLBWHLLD.QPHYHRGIQLWVRD    |
| TaBE | QRF | ANLRLL   | LAYQAAQP | GKLLFMG  | GEFGQLREWNN     | HASLDWHLTK.EPPTHGVMWVVRT           |
| CbBE | QKF | ANLRLL   | YGYMSQP  | GKLLFMG  | GEFGQ           | WREWNNHDESLDWHLLN.FTHHTGLQKVVED    |
| DaBE | QKF | ANLRLL   | YGYMYAHG | GKLLFMG  | DEIAQWDEWSD     | HERSLDWHLLK.YEPHAGLQTVVVRD         |
| HhBE | QKF | ANLRLL   | YMYAHG   | GKLLFMG  | GEFGQ           | WDEWNNHDRGLDWFLLE.YPTHHRGVQMLVVRD  |
| AaBE | QKF | ANLRALL  | YGMWAHP  | GKLLFMG  | GEFGQ           | FKEDWHEHETSLDWHLLE.YPESHHRGIQRLVKD |

|      |      |          |          |      |         |                                      |                       |                           |                          |                        |
|------|------|----------|----------|------|---------|--------------------------------------|-----------------------|---------------------------|--------------------------|------------------------|
|      | 510  | 520      | 530      | 540  | 550     |                                      |                       |                           |                          |                        |
| RpBE | LNH  | LYRTHPAL | WH.DG    | PEGF | EWIDFND | DRDQSVICYLRKHT...DRLLLFVLFNFTVPV     |                       |                           |                          |                        |
| BfBE | LLE  | IYRKY    | PALYEV   | NDNW | GGFEWIN | ADDKERSTYSFYRRAS...NGKDNILFVLFNFTPME |                       |                           |                          |                        |
| MbBE | LGG  | MYAERQ   | ELWLD    | DP   | PESE    | FEWIDCSDRDN                          | SVLVYLRKVC            | SAGPGGAHC                 | VVLFNFTVPV               |                        |
| ThBE | LNRT | YRDT     | PALWTQ   | DTVP | DGFTW   | LDGGDAGGN                            | ILSFLRWGD...DGS.VLACL | VFNFTGGP                  |                          |                        |
| TeBE | LNH  | LYRSQ    | PALYSQ   | DFKQ | EGFEW   | IDCS                                 | DNRH                  | SVVS                      | FIRWDK...DYQDFVVVVCNFTQP |                        |
| LnBE | LNGL | YRAE     | PALWEA   | DYDF | AGFQ    | WIDCS                                | DHEQ                  | SVLS                      | FVRRAL...RPAP            | ECVILNFTVPV            |
| RoBE | LNH  | LYRTH    | PALWH.DG | PEGF | EWIDF   | SDRDQSVICYLRKNA...GRM                | LLFVLFNFTVPV          |                           |                          |                        |
| TaBE | LNRL | IYRET    | PALHEG   | TEP  | DGFEW   | VDHADHTQ                             | SVLAF                 | FLRWGR...DRTRP            | VLSVFNFTVPV              |                        |
| CbBE | LNRL | IYRE     | KALYEL   | DFD  | PAGFR   | WIDCN                                | DVEN                  | STLS                      | YLR                      | LGH...LPDEVVILVFNFTVPV |
| DaBE | LNN  | AYRRE    | PALHELD  | DFKQ | EGFEW   | VDFRD                                | DRDQSVIS              | FLRKSS...RGD.VILVLFNFTVPV |                          |                        |
| HhBE | LNRL | YVKE     | NPALYEL  | DFSP | EGFEW   | VDFS                                 | SDQSVIS               | FLRKDR...QGNM             | ILAVFNFTVPV              |                        |
| AaBE | LNRE | VYRRE    | KALHET   | DFSP | EGFEW   | VDFD                                 | WEKSVIS               | FLRKDK...SGKEI            | ILVVCNFTVPV              |                        |

|      |      |      |      |     |      |           |          |         |          |        |       |       |    |    |       |       |     |    |    |     |   |   |   |   |   |   |    |    |   |   |   |   |   |    |   |   |   |   |   |   |   |   |   |   |   |   |   |   |   |   |   |   |
|------|------|------|------|-----|------|-----------|----------|---------|----------|--------|-------|-------|----|----|-------|-------|-----|----|----|-----|---|---|---|---|---|---|----|----|---|---|---|---|---|----|---|---|---|---|---|---|---|---|---|---|---|---|---|---|---|---|---|---|
|      | 560  | 570  | 580  | 590 | 600  | 610       |          |         |          |        |       |       |    |    |       |       |     |    |    |     |   |   |   |   |   |   |    |    |   |   |   |   |   |    |   |   |   |   |   |   |   |   |   |   |   |   |   |   |   |   |   |   |
| RpBE | REH  | YRVG | VP   | IG  | GPWR | EVLNSDAVA | YGGSGMGN | FG      | GRVE.AVP | ESWHGR | RP    | FHLE  | LT | LP | PL    | AI    |     |    |    |     |   |   |   |   |   |   |    |    |   |   |   |   |   |    |   |   |   |   |   |   |   |   |   |   |   |   |   |   |   |   |   |   |
| BfBE | RKG  | FKV  | GV   | PF  | DTY  | TKIL      | DSAKEC   | YGGSGSS | VDPDK    | IK.AVK | GLCDY | KDY   | SI | EF | DL    | PPYGA |     |    |    |     |   |   |   |   |   |   |    |    |   |   |   |   |   |    |   |   |   |   |   |   |   |   |   |   |   |   |   |   |   |   |   |   |
| MbBE | RED  | YRIG | VPP  | QAG | GRY  | VER       | LSSD     | DRR     | FGGSE    | FE     | TIRE  | LH.TE | P  | I  | AAHGR | DQSL  | LLR | LP | PL | IGC |   |   |   |   |   |   |    |    |   |   |   |   |   |    |   |   |   |   |   |   |   |   |   |   |   |   |   |   |   |   |   |   |
| ThBE | YPER | RVGL | PRAG | RWR | EIL  | NTD       | DAAL     | YGGSGV  | SQPGI    | I      | EATE  | D     | V  | P  | W     | NGQ   | P   | A  | S  | A   | L | V | T | Y | P | P | L  | G  |   |   |   |   |   |    |   |   |   |   |   |   |   |   |   |   |   |   |   |   |   |   |   |   |
| TeBE | HSH  | YRIG | VPEH | GFY | RE   | L         | F        | N       | S        | D      | A     | R     | E  | Y  | G     | G     | S   | N  | M  | G   | N | L | G | G | K | W | .A | D  | E | W | P | Y | H | Q  | R | R | Y | S | L | D | L | C | L | P | P | L | A |   |   |   |   |   |
| LnBE | RFG  | YRV  | GL   | PRG | CTW  | R         | E        | L       | N        | T      | D     | S     | A  | Y  | G     | G     | S   | N  | L  | G   | N | G | G | W | V | R | .A | E  | V | P | W | H | G | L  | P | S | A | A | L | T | L | P | P | L | A |   |   |   |   |   |   |   |
| RoBE | REH  | YRV  | GV   | PIG | GPWR | EVLNSDAVA | YGGSGMGN | FG      | GRVE.AVP | ESWHGR | RP    | FHLE  | LT | LP | PL    | AA    |     |    |    |     |   |   |   |   |   |   |    |    |   |   |   |   |   |    |   |   |   |   |   |   |   |   |   |   |   |   |   |   |   |   |   |   |
| TaBE | REG  | YRL  | GA   | PIE | GRW  | T         | V        | L       | A        | N      | S     | D     | R  | A  | E     | Y     | G   | G  | S  | G   | V | G | M | S | G | T | V  | .T | E | G | T | P | S | H  | G | R | P | F | S | L | S | L | T | L | P | P | L | G |   |   |   |   |
| CbBE | RFN  | YV   | L    | G   | V    | P         | Y        | G       | E        | W      | K     | E     | I  | L  | N     | S     | D   | A  | V  | D   | Y | G | G | S | G | Y | G  | N  | L | G | S | V | I | .A | E | L | S | S | H | N | F | P | S | L | K | L | T | L | P | P | L | G |
| DaBE | RGG  | YRV  | GV   | PEE | GFWE | E         | I        | L       | N        | S      | D     | S     | R  | V  | Y     | G     | G   | S  | G  | I   | G | N | A | B | G | V | K  | .T | E | K | I | P | Y | H  | E | R | P | H | S | I | V | L | T | L | P | P | L | A |   |   |   |   |
| HhBE | RHN  | YRIG | VPEK | GYW | K    | V         | I        | N       | S        | D      | S     | T     | K  | Y  | G     | G     | S   | G  | Y  | Q   | D | S | E | G | F | H | .T | E  | P | I | A | F | H | S  | R | P | Y | S | V | S | L | V | L | P | P | L | A |   |   |   |   |   |
| AaBE | RYD  | YRV  | GV   | PKG | GYW  | R         | E        | I       | M        | N      | T     | D     | A  | K  | E     | Y     | G   | G  | S  | G   | M | G | N | L | G | K | E  | .A | D | K | I | P | W | H  | G | R | K | P | F | S | L | S | L | T | L | P | P | L | S |   |   |   |

|      |     |                    |       |
|------|-----|--------------------|-------|
|      | 620 |                    |       |
| RpBE | LIL | EPES               | ..... |
| BfBE | EVF | VFQTKKTKN          | ..... |
| MbBE | LVL | VPG                | ..... |
| ThBE | SWL | VFDGE              | ..... |
| TeBE | LIL | KLDREKTVAERARYNLQS |       |
| LnBE | LVL | QPETIPTSG          | ..... |
| RoBE | LIL | EPEHG              | ..... |
| TaBE | LFL | QAPR               | ..... |
| CbBE | LFF | KHR                | ..... |
| DaBE | LFL | KYRG               | ..... |
| HhBE | LYL | RRDPS              | ..... |
| AaBE | LYL | KHEG               | ..... |
