# Supplementary material for: Elucidation of the noncovalent interactions driving enzyme activity guides branching enzyme engineering for α-glucan modification
Source: Springer Nature journal article supplement (doi:10.1038/s41467-024-53018-6), 2024-10-09
Supplement: MOESM6 [file 41467_2024_53018_MOESM6_ESM.xlsx]

## Sheet: Fig.1
	x					y	sd
	Enzymes	Optimal temperature	rep1	rep2	rep3	Activity (U/mg)
	AaBE	60	36	44	34	38	5.2915
	BfBE	40	1560	1433	1523	1505.33	65.3172
	RoBE	65	835	863	952	883.333	61.0928
	RpBE	60	1713	1853	1694	1753.33	86.8351
	CbBE	60	238	240	251	243	7
	TeBE	50	340	375	369	361.333	18.7172
	HhBE	50	126	145	133	134.667	9.60902
	TaBE	50	88	92	106	95.3333	9.45163
	DaBE	70	341	331	361	344.333	15.2753
	ThBE	60	125	143	132	133.333	9.07377
	MbBE	40	194	232	216	214	19.0788
	LnBE	70	198	220	241	219.667	21.5019

## Sheet: Fig.4c
	x	y
	Site	ΔE (kcal/mol)
	D269	-15.6186
	W270	-15.7449
	R392	-8.92939
	E425	-7.61535
	H428	-1.9893
	G429	-3.11547
	K430	-6.19007

## Sheet: Fig.4d
		D269	W270
	x	y	y
	Time (ns)	ΔE (kcal/mol)	ΔE (kcal/mol)
	100	-6.0323	-22.0644
	100.1	-3.0904	-24.2212
	100.2	-3.1278	-21.6639
	100.3	-1.1625	-24.2633
	100.4	-10.8755	-19.2928
	100.5	-1.1365	-22.9196
	100.6	0.7231	-19.1905
	100.7	-2.7586	-22.0543
	100.8	3.4864	-22.3295
	100.9	-9.0764	-18.9653
	101	5.4351	-19.952
	101.1	1.5811	-18.3993
	101.2	4.1397	-17.2535
	101.3	1.2803	-14.3309
	101.4	5.049	-17.4635
	101.5	-1.2189	-14.6727
	101.6	0.0864	-19.2328
	101.7	6.0688	-20.4043
	101.8	2.6169	-13.7048
	101.9	1.8018	-22.8114
	102	3.3532	-27.1869
	102.1	0.4913	-18.999
	102.2	-1.9191	-19.2917
	102.3	0.4225	-14.8456
	102.4	-0.8329	-26.2849
	102.5	0.4749	-20.7641
	102.6	-0.2107	-22.5271
	102.7	-2.7465	-22.0274
	102.8	-9.2496	-22.5582
	102.9	-9.0582	-22.278
	103	-6.9112	-20.0613
	103.1	-8.5375	-21.4623
	103.2	-10.3752	-18.1699
	103.3	-9.8592	-21.2008
	103.4	-8.5702	-24.3308
	103.5	-9.7133	-24.4017
	103.6	-3.9448	-21.2089
	103.7	-5.3453	-24.6387
	103.8	-0.4393	-24.1451
	103.9	1.7311	-23.3631
	104	0.5095	-19.5815
	104.1	2.0878	-18.7188
	104.2	-1.0918	-18.6434
	104.3	-2.7068	-19.6504
	104.4	-9.0129	-16.6345
	104.5	-8.5131	-14.5783
	104.6	4.2841	-16.7724
	104.7	0.6265	-19.3075
	104.8	-3.0663	-14.5723
	104.9	-17.4069	-11.9492
	105	-0.3049	-12.9836
	105.1	-0.8262	-17.0558
	105.2	-14.6838	-16.5671
	105.3	-31.3996	-15.9454
	105.4	-10.1739	-19.0678
	105.5	-25.3218	-18.8065
	105.6	1.716	-15.6749
	105.7	-14.0136	-24.5393
	105.8	2.9038	-14.6496
	105.9	-14.6906	-15.8688
	106	-18.229	-14.9544
	106.1	-21.0349	-13.8194
	106.2	-24.8835	-14.6136
	106.3	-15.5184	-12.3127
	106.4	-30.0416	-15.8677
	106.5	-1.5614	-15.2226
	106.6	12.1503	-15.5325
	106.7	-3.0108	-19.7844
	106.8	-14.1126	-20.0249
	106.9	1.4153	-19.111
	107	0.3757	-19.6094
	107.1	-4.1785	-10.5407
	107.2	-18.1811	-15.7248
	107.3	2.3894	-15.8419
	107.4	-4.5547	-17.794
	107.5	0.9371	-19.9153
	107.6	-1.5055	-13.3074
	107.7	3.2709	-17.0039
	107.8	0.9808	-13.2778
	107.9	3.1702	-17.6176
	108	0.3607	-15.3776
	108.1	-2.0463	-9.3607
	108.2	3.9634	-7.2495
	108.3	1.9063	-12.7236
	108.4	4.8203	-11.0219
	108.5	5.3629	-9.75
	108.6	-2.6049	-9.9423
	108.7	4.3039	-13.03
	108.8	0.3796	-10.9735
	108.9	0.5065	-14.3788
	109	-1.5641	-10.7237
	109.1	2.4076	-9.9056
	109.2	3.4021	-17.2764
	109.3	3.1589	-15.781
	109.4	3.5246	-12.9966
	109.5	3.2153	-18.3723
	109.6	1.974	-13.1501
	109.7	-0.5676	-9.8313
	109.8	1.7034	-12.3105
	109.9	-0.7011	-11.9821
	110	4.6181	-11.4307
	110.1	-0.2136	-9.4595
	110.2	1.4917	-7.8811
	110.3	-0.6527	-14.8176
	110.4	-8.7771	-10.1653
	110.5	-2.2239	-9.8909
	110.6	-11.1323	-11.6132
	110.7	-8.6724	-12.8015
	110.8	-8.4186	-14.0801
	110.9	-4.3372	-10.022
	111	-4.2994	-12.8613
	111.1	-2.7961	-16.5395
	111.2	-6.732	-16.353
	111.3	-10.05	-24.9374
	111.4	-23.6935	-17.5052
	111.5	-0.2768	-13.1622
	111.6	1.84	-18.2162
	111.7	-21.0769	-19.0457
	111.8	-31.5638	-14.492
	111.9	-20.6537	-14.2887
	112	-25.6456	-15.2202
	112.1	-35.6739	-14.3919
	112.2	-33.5634	-14.6795
	112.3	-5.2284	-10.3641
	112.4	-37.3676	-13.0629
	112.5	-33.9253	-17.8082
	112.6	-30.651	-19.7723
	112.7	-27.6013	-15.5656
	112.8	-35.3606	-15.8045
	112.9	-14.5193	-12.6237
	113	-12.1794	-16.8783
	113.1	-11.3644	-17.5604
	113.2	-12.9723	-23.1604
	113.3	-16.2319	-13.9133
	113.4	-9.406	-20.6952
	113.5	-13.9392	-17.8045
	113.6	-5.3926	-16.1692
	113.7	-38.0747	-17.316
	113.8	-31.0924	-15.7637
	113.9	-7.4557	-15.4
	114	-15.1027	-12.8304
	114.1	-14.1726	-13.5768
	114.2	-0.7451	-12.0158
	114.3	-4.162	-10.7699
	114.4	-7.2794	-15.1662
	114.5	-2.4323	-13.9227
	114.6	-0.4435	-10.6382
	114.7	-4.6802	-17.2895
	114.8	-3.1365	-15.7051
	114.9	-6.3191	-13.0356
	115	-2.17	-18.4239
	115.1	6.8975	-13.7483
	115.2	-5.4247	-14.8278
	115.3	8.3956	-12.6152
	115.4	3.6843	-13.0284
	115.5	-13.7255	-10.8853
	115.6	-6.1055	-13.8787
	115.7	3.3441	-14.1024
	115.8	-7.7206	-14.2828
	115.9	-1.8588	-10.1097
	116	-4.2402	-9.613
	116.1	2.0124	-11.9751
	116.2	-5.616	-12.476
	116.3	-3.8695	-14.3645
	116.4	6.729	-11.2196
	116.5	-6.4715	-11.797
	116.6	-3.9193	-13.8283
	116.7	-4.1783	-15.0412
	116.8	-21.7322	-16.0677
	116.9	-9.1722	-13.502
	117	-9.2658	-11.3719
	117.1	-9.2519	-18.4387
	117.2	-3.8075	-20.3822
	117.3	-10.1026	-13.5054
	117.4	0.6837	-20.9574
	117.5	-15.2713	-19.8917
	117.6	-2.2789	-12.5378
	117.7	-4.6427	-14.2502
	117.8	-0.4101	-14.4862
	117.9	-5.4361	-14.4706
	118	1.8607	-17.1084
	118.1	0.3532	-18.1871
	118.2	-12.9345	-17.8991
	118.3	-20.2536	-20.3359
	118.4	-9.4995	-24.0277
	118.5	-9.6478	-11.2421
	118.6	3.1167	-17.9542
	118.7	0.2101	-13.5059
	118.8	0.5858	-12.4881
	118.9	6.6014	-15.045
	119	6.3774	-13.8476
	119.1	-1.6412	-17.3521
	119.2	4.578	-18.168
	119.3	1.989	-17.8617
	119.4	0.4047	-16.1223
	119.5	-4.5631	-18.5726
	119.6	-11.71	-14.0728
	119.7	-19.133	-17.7383
	119.8	-7.4533	-22.9507
	119.9	2.6452	-16.8501
	120	-1.5969	-15.2852
	120.1	-7.0777	-20.1566
	120.2	0.7924	-18.6403
	120.3	-13.8234	-23.3876
	120.4	0.7654	-19.5402
	120.5	-11.4435	-24.435
	120.6	-20.4395	-19.8153
	120.7	1.4122	-18.5196
	120.8	5.0074	-16.2254
	120.9	-0.7551	-12.9558
	121	-2.9244	-21.7765
	121.1	3.4279	-15.8507
	121.2	-7.5835	-20.1832
	121.3	-32.8419	-13.0053
	121.4	-7.6246	-15.4482
	121.5	-4.2178	-15.7432
	121.6	-22.0649	-14.1169
	121.7	4.0371	-14.8215
	121.8	1.1132	-16.1529
	121.9	0.3455	-16.6856
	122	0.4763	-14.496
	122.1	-13.1896	-19.8496
	122.2	-8.5745	-27.7106
	122.3	-5.9394	-20.2452
	122.4	-12.1543	-19.3401
	122.5	-8.1643	-22.4945
	122.6	-14.0083	-22.2126
	122.7	-1.8267	-18.3374
	122.8	-8.3341	-21.5141
	122.9	-6.3342	-26.4609
	123	-0.7555	-26.028
	123.1	0.5616	-21.258
	123.2	-7.8656	-19.9673
	123.3	-0.2439	-19.6219
	123.4	-5.4319	-20.4412
	123.5	0.629	-23.5996
	123.6	-6.6475	-21.5888
	123.7	-4.3903	-21.7923
	123.8	-1.5722	-20.5734
	123.9	-5.0206	-18.0369
	124	0.0258	-16.9313
	124.1	11.5581	-16.7981
	124.2	4.4352	-14.679
	124.3	8.3229	-14.0196
	124.4	5.9405	-13.3071
	124.5	5.6284	-15.2755
	124.6	2.3556	-12.4652
	124.7	13.8592	-14.4361
	124.8	4.2017	-16.5907
	124.9	-0.9399	-14.9952
	125	-5.8321	-16.0449
	125.1	-3.6799	-11.6142
	125.2	-0.4167	-14.3583
	125.3	-5.3649	-11.1406
	125.4	-0.3332	-15.6072
	125.5	-1.0724	-12.6289
	125.6	10.5942	-15.6254
	125.7	-1.2351	-15.3371
	125.8	17.7421	-13.0476
	125.9	-12.9478	-14.115
	126	4.2851	-14.4161
	126.1	0.1398	-18.1741
	126.2	1.8377	-13.831
	126.3	5.5753	-14.0261
	126.4	2.4417	-14.8656
	126.5	-5.189	-24.4858
	126.6	-0.8957	-17.0055
	126.7	-23.727	-11.7106
	126.8	-24.5098	-13.6265
	126.9	-26.1143	-16.9147
	127	4.2491	-17.2415
	127.1	-0.0748	-12.0232
	127.2	3.4498	-17.254
	127.3	2.1994	-14.2372
	127.4	-1.7584	-11.3481
	127.5	-15.7911	-16.3471
	127.6	4.5346	-14.5181
	127.7	0.3786	-18.0662
	127.8	0.177	-13.7519
	127.9	7.3978	-15.3634
	128	6.4627	-16.9285
	128.1	7.5337	-12.0572
	128.2	11.3978	-16.77
	128.3	6.0972	-15.4676
	128.4	-2.3597	-16.012
	128.5	2.5713	-11.4573
	128.6	-2.3775	-15.8456
	128.7	1.2479	-13.4029
	128.8	6.8931	-13.7943
	128.9	5.7621	-15.8755
	129	2.9302	-11.7022
	129.1	-3.4957	-17.1654
	129.2	6.9712	-15.1371
	129.3	0.5014	-15.3827
	129.4	5.9464	-16.6401
	129.5	2.9332	-12.851
	129.6	-2.9761	-11.4677
	129.7	1.1662	-17.8399
	129.8	2.3544	-15.0443
	129.9	-0.7264	-16.1403
	130	-9.3345	-15.9251
	130.1	4.8474	-13.4944
	130.2	4.3291	-11.4051
	130.3	2.5043	-11.4545
	130.4	-0.3821	-12.3167
	130.5	1.4079	-14.4721
	130.6	-10.3482	-12.5922
	130.7	-29.5101	-17.8826
	130.8	-6.4473	-19.2562
	130.9	-2.4264	-16.829
	131	-11.4967	-12.3478
	131.1	-8.3479	-14.7044
	131.2	-3.7358	-16.1383
	131.3	-21.9644	-20.2848
	131.4	-2.5657	-20.041
	131.5	-14.4646	-19.8868
	131.6	-6.4367	-13.2247
	131.7	-7.2626	-18.5558
	131.8	-12.0705	-20.0504
	131.9	-6.5712	-18.7965
	132	-7.1204	-13.7926
	132.1	-2.1299	-16.3888
	132.2	-10.8298	-20.9382
	132.3	-6.9766	-17.5504
	132.4	-17.113	-18.9371
	132.5	-20.7492	-15.23
	132.6	-24.6543	-11.202
	132.7	-28.9504	-16.5676
	132.8	-39.4446	-13.5988
	132.9	-3.5257	-18.0004
	133	-9.4606	-15.8622
	133.1	-23.952	-14.1742
	133.2	-34.4298	-14.5097
	133.3	-6.425	-13.0829
	133.4	-20.351	-16.9971
	133.5	0.1994	-15.414
	133.6	-16.8134	-18.4961
	133.7	-7.2965	-13.9889
	133.8	-32.8755	-8.5461
	133.9	-29.6046	-17.8099
	134	-32.6317	-13.8625
	134.1	-8.1299	-11.2099
	134.2	0.022	-11.3112
	134.3	-18.3032	-8.5005
	134.4	-21.833	-16.0014
	134.5	-12.7018	-10.1948
	134.6	-15.465	-13.097
	134.7	-12.5488	-7.4624
	134.8	-21.6816	-12.1696
	134.9	-35.7961	-15.7896
	135	-5.4891	-14.1761
	135.1	-32.258	-13.7409
	135.2	-17.0061	-15.7515
	135.3	-10.4857	-17.8106
	135.4	-22.8628	-18.0515
	135.5	-27.3826	-18.4054
	135.6	-37.1195	-16.2482
	135.7	-17.0667	-14.5237
	135.8	-13.054	-17.4035
	135.9	-14.1074	-13.9714
	136	-16.2094	-17.0223
	136.1	-14.6395	-14.0944
	136.2	-27.1594	-13.8246
	136.3	-35.2909	-13.847
	136.4	-31.6599	-12.0847
	136.5	-35.3175	-11.4539
	136.6	-4.8769	-10.6832
	136.7	-5.78	-11.0492
	136.8	-12.46	-17.3766
	136.9	-18.2345	-9.347
	137	-9.3447	-11.9669
	137.1	-17.4976	-6.7198
	137.2	-21.1852	-17.3678
	137.3	-10.8816	-13.7636
	137.4	-0.4122	-20.6006
	137.5	5.809	-17.7228
	137.6	3.2754	-19.5509
	137.7	8.4891	-14.1161
	137.8	-19.4695	-18.5365
	137.9	-30.3626	-16.4357
	138	-3.3357	-13.9983
	138.1	2.2057	-15.3203
	138.2	-7.3191	-9.3753
	138.3	-19.3536	-14.1377
	138.4	-1.7589	-14.3502
	138.5	2.2392	-15.7388
	138.6	-13.2375	-21.448
	138.7	-6.5312	-17.6252
	138.8	-5.4082	-18.9553
	138.9	2.159	-14.5552
	139	-14.3436	-19.5286
	139.1	-7.279	-12.2392
	139.2	-5.3073	-14.3792
	139.3	-30.0532	-16.1689
	139.4	-21.5986	-20.9558
	139.5	-32.0694	-14.8366
	139.6	-40.4516	-18.4193
	139.7	-36.9842	-19.5161
	139.8	-14.2254	-13.4915
	139.9	-20.3608	-14.2704
	140	-21.047	-14.6329
	140.1	-32.5769	-16.7954
	140.2	-20.4319	-17.562
	140.3	-26.0795	-19.17
	140.4	-17.445	-17.1324
	140.5	-11.1785	-14.302
	140.6	-4.6399	-20.5733
	140.7	-20.1776	-19.8592
	140.8	-30.9246	-14.9912
	140.9	-19.6711	-17.7389
	141	-17.1152	-16.1442
	141.1	-1.245	-15.735
	141.2	-7.0585	-13.6149
	141.3	-30.4755	-16.9408
	141.4	-30.5151	-15.3997
	141.5	-36.4549	-14.451
	141.6	-36.7634	-15.8982
	141.7	-32.3532	-15.5977
	141.8	-24.1513	-14.5647
	141.9	-14.5526	-12.8726
	142	-24.9626	-13.7475
	142.1	-7.0582	-18.2198
	142.2	-26.0819	-14.8457
	142.3	-27.7865	-16.9066
	142.4	-21.5834	-16.2767
	142.5	-21.4164	-11.8091
	142.6	-23.9556	-13.5825
	142.7	-13.4981	-14.1251
	142.8	-17.8785	-13.8136
	142.9	-30.1515	-16.1092
	143	-29.4579	-16.5005
	143.1	-51.5765	-17.8057
	143.2	-30.7359	-15.7884
	143.3	-31.6631	-17.8061
	143.4	-17.1655	-12.7295
	143.5	-25.5199	-15.8282
	143.6	-18.6009	-19.1009
	143.7	-22.7654	-19.1987
	143.8	-10.1324	-13.9197
	143.9	-12.2929	-13.381
	144	-13.5599	-12.722
	144.1	-28.9565	-16.2376
	144.2	-13.3846	-15.7232
	144.3	-14.8403	-15.0068
	144.4	-24.7068	-10.4728
	144.5	-18.4379	-13.8917
	144.6	-33.825	-14.4268
	144.7	-22.8697	-12.722
	144.8	-28.076	-10.4975
	144.9	-32.7892	-14.0495
	145	-18.6849	-19.6016
	145.1	-22.6075	-20.0094
	145.2	-21.2423	-14.4201
	145.3	-6.2547	-20.2356
	145.4	-5.1629	-17.9792
	145.5	-22.1443	-15.4203
	145.6	-26.1868	-18.0708
	145.7	-30.4555	-15.6467
	145.8	-18.3507	-17.0311
	145.9	-24.1291	-15.7551
	146	-24.5307	-12.6856
	146.1	-19.481	-14.4786
	146.2	-10.9259	-15.6323
	146.3	-27.6041	-10.3826
	146.4	-35.6572	-12.4211
	146.5	-17.6211	-17.681
	146.6	-25.3605	-13.8405
	146.7	-14.6596	-16.515
	146.8	-17.6465	-15.3835
	146.9	-15.662	-15.6001
	147	-38.5163	-17.9083
	147.1	-25.1356	-13.5474
	147.2	-24.4985	-15.0481
	147.3	-43.8949	-22.6013
	147.4	-28.7736	-14.3086
	147.5	-31.6333	-18.6181
	147.6	-35.0657	-17.7709
	147.7	-30.4062	-16.8358
	147.8	-33.4468	-19.8015
	147.9	-33.4475	-17.297
	148	-33.3567	-19.7776
	148.1	-40.3909	-17.2204
	148.2	-23.8859	-16.268
	148.3	-33.0701	-17.6115
	148.4	-21.741	-18.0452
	148.5	-26.381	-20.9438
	148.6	-18.6866	-17.9852
	148.7	-30.1514	-15.1936
	148.8	-33.474	-17.7617
	148.9	-30.5569	-17.5041
	149	-29.822	-19.5527
	149.1	-23.4245	-21.0051
	149.2	-24.5924	-15.5011
	149.3	-23.0576	-19.3214
	149.4	-28.6219	-15.5537
	149.5	-16.3398	-15.9145
	149.6	-35.0609	-12.8473
	149.7	-43.5886	-17.257
	149.8	-32.7382	-13.1102
	149.9	-37.6411	-16.6169
	150	-33.4372	-18.6682
	150.1	-40.6905	-14.8184
	150.2	-26.7732	-18.3839
	150.3	-23.0796	-15.9819
	150.4	-35.8659	-15.8172
	150.5	-39.7736	-17.7427
	150.6	-26.4875	-16.36
	150.7	-53.0802	-18.3472
	150.8	-24.8593	-14.8199
	150.9	-35.9212	-18.2953
	151	-46.7483	-16.8663
	151.1	-51.8005	-10.693
	151.2	-53.8707	-14.3057
	151.3	-39.5321	-14.2823
	151.4	-34.0155	-12.6901
	151.5	-38.2572	-14.4508
	151.6	-54.7009	-11.3942
	151.7	-48.1839	-17.2927
	151.8	-57.167	-13.6094
	151.9	-59.0847	-8.333
	152	-56.4596	-11.6047
	152.1	-51.9969	-15.0686
	152.2	-56.3381	-14.5147
	152.3	-61.244	-16.9893
	152.4	-38.926	-12.9892
	152.5	-37.2149	-18.3879
	152.6	-56.4006	-16.3274
	152.7	-38.8277	-15.0106
	152.8	-59.7334	-13.0822
	152.9	-52.4644	-8.6511
	153	-39.4316	-12.2902
	153.1	-39.2652	-18.5644
	153.2	-32.9566	-15.5497
	153.3	-45.6459	-8.7436
	153.4	-39.3794	-17.4494
	153.5	-47.7273	-15.3262
	153.6	-63.9414	-12.1346
	153.7	-52.668	-14.837
	153.8	-34.6722	-16.5683
	153.9	-44.2229	-13.636
	154	-64.8283	-18.0513
	154.1	-36.7137	-14.5112
	154.2	-52.0748	-16.4978
	154.3	-59.5966	-19.1478
	154.4	-55.1582	-16.6593
	154.5	-47.0436	-15.6615
	154.6	-22.2718	-12.8387
	154.7	-45.3298	-15.6332
	154.8	-48.8558	-14.7484
	154.9	-60.6475	-14.0366
	155	-45.7996	-15.5404
	155.1	-15.0212	-16.0963
	155.2	-38.8175	-17.4082
	155.3	-23.748	-12.9503
	155.4	-33.0245	-13.6291
	155.5	-29.1107	-17.8076
	155.6	-44.3277	-17.4533
	155.7	-24.7196	-14.4395
	155.8	-26.4422	-13.9602
	155.9	-51.6401	-15.162
	156	-33.64	-15.0072
	156.1	-60.2293	-18.3471
	156.2	-46.2772	-15.4169
	156.3	-42.7299	-11.5455
	156.4	-39.8733	-16.001
	156.5	-34.7523	-10.5539
	156.6	-37.1623	-18.538
	156.7	-27.3379	-17.826
	156.8	-26.9658	-14.7428
	156.9	-32.6053	-15.5918
	157	-63.9987	-17.914
	157.1	-60.3713	-19.4384
	157.2	-32.5252	-17.4488
	157.3	-40.6213	-15.8336
	157.4	-43.4246	-15.248
	157.5	-29.5287	-15.9323
	157.6	-30.2758	-16.9444
	157.7	-28.4383	-13.2194
	157.8	-24.8882	-19.4952
	157.9	-29.4205	-20.4957
	158	-28.3983	-20.7381
	158.1	-33.7215	-17.1806
	158.2	-21.5117	-20.1869
	158.3	-31.2581	-19.9423
	158.4	-35.1821	-18.824
	158.5	-31.0089	-18.8225
	158.6	-26.6038	-20.4465
	158.7	-25.5492	-18.1629
	158.8	-30.131	-16.2729
	158.9	-19.444	-16.4728
	159	-24.838	-17.0205
	159.1	-28.9332	-17.3145
	159.2	-28.5665	-17.0511
	159.3	-12.3091	-18.3913
	159.4	-25.7173	-17.2049
	159.5	-24.5684	-14.2141
	159.6	-22.2052	-13.054
	159.7	-23.3431	-16.6806
	159.8	-5.6552	-15.2614
	159.9	-28.9624	-22.7737
	160	-22.3954	-19.6636
	160.1	-18.4381	-24.1642
	160.2	-25.613	-17.3342
	160.3	-14.9527	-17.3793
	160.4	-34.928	-18.231
	160.5	-22.3321	-23.9833
	160.6	-13.2358	-16.1972
	160.7	-25.6847	-20.3533
	160.8	-33.2018	-16.3746
	160.9	-32.9342	-22.4513
	161	-25.3797	-15.9061
	161.1	-28.6763	-22.8943
	161.2	-30.3327	-18.8827
	161.3	-13.7521	-18.8804
	161.4	-37.3339	-18.2969
	161.5	-28.0614	-13.9336
	161.6	-29.717	-14.9231
	161.7	-27.2518	-16.4755
	161.8	-14.5957	-13.6262
	161.9	-38.3741	-20.6292
	162	-34.146	-18.1856
	162.1	-28.9079	-15.9052
	162.2	-22.6967	-18.5137
	162.3	-1.743	-18.3224
	162.4	-24.0647	-18.9746
	162.5	-25.556	-18.6077
	162.6	-36.7675	-14.3828
	162.7	-26.7531	-23.5182
	162.8	-22.6233	-13.6083
	162.9	-29.4175	-13.4403
	163	-19.9031	-13.6466
	163.1	-39.7977	-20.1351
	163.2	-31.7708	-15.6956
	163.3	-26.2989	-12.36
	163.4	-10.476	-15.0942
	163.5	-34.2161	-16.0483
	163.6	-29.2286	-14.9706
	163.7	-22.7354	-15.4006
	163.8	-18.8796	-15.558
	163.9	-13.9893	-14.2213
	164	-22.8751	-14.3579
	164.1	-24.7701	-14.0126
	164.2	-21.7979	-15.7436
	164.3	-17.0342	-12.8865
	164.4	-18.3829	-15.4729
	164.5	-21.043	-12.3647
	164.6	-36.3119	-15.4043
	164.7	-28.1305	-16.374
	164.8	-31.3844	-14.2966
	164.9	-26.6909	-13.9241
	165	-23.1365	-17.7583
	165.1	-17.8502	-19.4982
	165.2	-23.9238	-14.0055
	165.3	-30.9658	-15.1806
	165.4	-33.2607	-14.0024
	165.5	-19.3799	-13.155
	165.6	-25.3917	-9.925
	165.7	-35.8717	-11.7638
	165.8	-33.8212	-15.5528
	165.9	-28.8324	-12.488
	166	-34.2158	-12.408
	166.1	-27.2898	-13.8112
	166.2	-35.9235	-12.6603
	166.3	-26.7973	-11.6415
	166.4	-41.2346	-11.0679
	166.5	-26.7101	-11.9631
	166.6	-30.215	-12.5032
	166.7	-23.7947	-14.0042
	166.8	-25.7764	-11.0937
	166.9	-35.2907	-14.5287
	167	-24.5996	-12.0105
	167.1	-11.5233	-11.5744
	167.2	-13.0721	-17.8083
	167.3	-12.9723	-14.6769
	167.4	-34.4757	-14.6024
	167.5	-11.8695	-20.2271
	167.6	-22.512	-18.4387
	167.7	-21.7169	-15.1086
	167.8	-35.3616	-14.6139
	167.9	-26.5513	-13.0495
	168	-33.691	-13.1907
	168.1	-28.7214	-14.5769
	168.2	-23.8416	-14.1085
	168.3	-33.7403	-12.641
	168.4	-3.1193	-13.6721
	168.5	-27.2332	-9.6279
	168.6	-45.5887	-11.4902
	168.7	-44.2223	-14.6873
	168.8	-33.5535	-10.9619
	168.9	-28.2142	-9.8163
	169	-37.1315	-11.3516
	169.1	-32.2309	-8.6339
	169.2	-20.3469	-14.9023
	169.3	-44.5309	-14.5167
	169.4	-33.164	-15.8287
	169.5	-13.6622	-13.721
	169.6	-13.7886	-16.7052
	169.7	0.1691	-16.2985
	169.8	-2.7535	-13.1337
	169.9	0.092	-16.0496
	170	-9.9205	-15.5448
	170.1	-13.4323	-15.6792
	170.2	-6.2917	-16.8262
	170.3	9.0548	-17.4696
	170.4	2.494	-14.2931
	170.5	-6.603	-14.8793
	170.6	3.3957	-17.7555
	170.7	-0.4088	-12.8788
	170.8	3.333	-15.3175
	170.9	4.5282	-14.6065
	171	-7.9076	-15.6716
	171.1	-13.734	-15.0739
	171.2	-30.8065	-16.2507
	171.3	-33.3563	-15.3249
	171.4	-3.9676	-12.1731
	171.5	-27.8364	-12.7098
	171.6	-19.504	-17.5179
	171.7	-15.6682	-19.1373
	171.8	-56.9381	-21.4145
	171.9	-18.0555	-18.5834
	172	-24.8982	-19.3871
	172.1	-10.8087	-16.1216
	172.2	-22.1853	-15.5832
	172.3	-54.2442	-16.766
	172.4	-17.5372	-18.9232
	172.5	-16.765	-15.2544
	172.6	2.3894	-11.9808
	172.7	-1.1874	-13.2541
	172.8	-0.0016	-12.3298
	172.9	-7.966	-13.0077
	173	-18.4859	-11.5363
	173.1	-48.6254	-12.5405
	173.2	-46.9691	-14.2575
	173.3	-60.669	-15.2644
	173.4	-46.1192	-16.2297
	173.5	-27.4558	-14.7217
	173.6	-32.29	-17.6103
	173.7	-50.5776	-12.0531
	173.8	-33.4918	-12.092
	173.9	-23.985	-12.7787
	174	-45.8845	-15.1664
	174.1	-51.7919	-8.9958
	174.2	-43.0714	-9.0185
	174.3	-62.1459	-9.0945
	174.4	-45.4993	-11.1484
	174.5	-48.768	-10.0886
	174.6	-29.9793	-8.3692
	174.7	-42.8964	-13.5742
	174.8	-37.0819	-12.3381
	174.9	-26.1916	-13.1901
	175	-19.1902	-15.8667
	175.1	-21.5762	-15.1195
	175.2	-19.0426	-17.857
	175.3	-8.8136	-18.077
	175.4	-36.0094	-11.4194
	175.5	-22.4956	-10.9834
	175.6	-32.6009	-11.6502
	175.7	-28.9761	-10.6365
	175.8	-32.86	-14.4323
	175.9	-24.3918	-12.8015
	176	-27.3418	-14.717
	176.1	-19.2728	-21.6772
	176.2	-36.8409	-15.0913
	176.3	-12.9054	-16.6341
	176.4	-20.9488	-16.3969
	176.5	-21.3338	-14.9245
	176.6	-37.9755	-12.1507
	176.7	-27.4538	-14.7974
	176.8	-4.7757	-15.9621
	176.9	-20.1887	-11.2369
	177	-10.8894	-12.0521
	177.1	-33.3093	-12.2111
	177.2	-35.3586	-14.7789
	177.3	-25.1065	-18.2063
	177.4	-27.989	-16.1215
	177.5	-22.1108	-12.4095
	177.6	-4.9643	-12.2942
	177.7	-21.4958	-13.9248
	177.8	-11.5613	-10.5165
	177.9	-23.9369	-12.5455
	178	-21.2439	-13.8587
	178.1	-12.6541	-14.8893
	178.2	-20.6005	-9.0005
	178.3	-37.6935	-14.132
	178.4	-25.7399	-10.768
	178.5	-21.7084	-11.1141
	178.6	-37.4595	-11.945
	178.7	-19.5573	-13.116
	178.8	-0.4678	-17.3417
	178.9	-11.606	-13.9315
	179	-33.5132	-12.3503
	179.1	-17.1689	-13.5106
	179.2	-12.4754	-14.5592
	179.3	-10.5842	-13.5243
	179.4	-5.3346	-14.6339
	179.5	-38.7908	-18.3773
	179.6	-45.0287	-16.7502
	179.7	-24.3852	-15.3228
	179.8	-24.694	-18.7026
	179.9	-21.1045	-17.9379
	180	-38.729	-20.422
	180.1	-16.2448	-16.1318
	180.2	-40.983	-17.5054
	180.3	-3.6515	-19.3
	180.4	-26.4129	-16.3877
	180.5	-27.5192	-20.1995
	180.6	-25.9367	-15.9755
	180.7	-24.2319	-14.1411
	180.8	-33.8323	-15.0095
	180.9	-22.0772	-14.8654
	181	-34.1847	-15.2449
	181.1	-50.3814	-15.3314
	181.2	-21.1633	-13.2466
	181.3	-39.5628	-16.3305
	181.4	-25.4404	-17.206
	181.5	-16.5572	-14.1771
	181.6	-27.4147	-14.883
	181.7	-23.8422	-12.8328
	181.8	-21.0393	-11.1972
	181.9	-15.6551	-19.2471
	182	-30.3775	-18.2353
	182.1	-30.4878	-11.0753
	182.2	-4.8374	-12.0602
	182.3	4.5301	-19.1728
	182.4	-18.3239	-15.9748
	182.5	-22.4742	-13.0388
	182.6	-14.6996	-12.7756
	182.7	-5.4111	-13.5648
	182.8	-3.7062	-15.2926
	182.9	-1.8482	-19.0041
	183	-0.4712	-17.5566
	183.1	-19.6437	-17.4735
	183.2	-21.8391	-14.761
	183.3	-7.5942	-16.8074
	183.4	-26.9861	-12.9588
	183.5	-12.6798	-17.8259
	183.6	-3.7305	-15.6713
	183.7	9.557	-18.3826
	183.8	-10.1911	-14.9214
	183.9	-5.0255	-15.9837
	184	10.5174	-17.9444
	184.1	10.0141	-14.5341
	184.2	-8.9078	-16.4564
	184.3	-28.8099	-12.3366
	184.4	-33.5576	-14.4953
	184.5	-15.9174	-14.9307
	184.6	-22.9568	-12.4687
	184.7	6.196	-17.4635
	184.8	4.0307	-18.7759
	184.9	3.0519	-17.6391
	185	11.7905	-15.3818
	185.1	10.1025	-17.2055
	185.2	5.9248	-16.8296
	185.3	-2.0678	-17.0441
	185.4	5.8302	-18.9062
	185.5	2.6397	-18.4305
	185.6	5.3692	-19.2916
	185.7	8.0095	-16.6666
	185.8	9.1787	-13.9382
	185.9	-0.0864	-16.2892
	186	1.6429	-18.8676
	186.1	7.0822	-19.9126
	186.2	3.3376	-12.9048
	186.3	6.0903	-18.2346
	186.4	-6.7487	-16.7005
	186.5	11.1444	-15.9391
	186.6	6.4726	-13.8321
	186.7	6.752	-17.3417
	186.8	8.4769	-17.7316
	186.9	11.7726	-16.8603
	187	-0.009	-13.6694
	187.1	-4.6264	-15.2223
	187.2	1.0222	-14.8648
	187.3	3.8724	-14.9805
	187.4	2.2903	-16.3837
	187.5	1.5792	-19.3663
	187.6	-10.0851	-18.7127
	187.7	-12.1931	-20.7488
	187.8	9.5333	-18.9555
	187.9	-10.493	-18.5762
	188	5	-17.285
	188.1	-12.0727	-16.4858
	188.2	-10.5632	-15.0593
	188.3	-2.0093	-18.5728
	188.4	-3.0962	-16.0765
	188.5	-7.367	-14.8065
	188.6	-8.8397	-15.6689
	188.7	-7.2559	-12.9205
	188.8	-8.1696	-15.5805
	188.9	-5.6292	-13.7721
	189	-6.3753	-13.4902
	189.1	1.4003	-9.4571
	189.2	-16.3665	-16.8002
	189.3	-26.1495	-14.1548
	189.4	-12.7673	-13.8367
	189.5	-9.0247	-15.7714
	189.6	-3.2821	-11.5335
	189.7	-0.1447	-10.1637
	189.8	-12.3239	-13.2161
	189.9	-9.3569	-11.8751
	190	-4.6123	-15.4659
	190.1	-14.427	-13.0967
	190.2	-9.8088	-16.9183
	190.3	2.058	-18.9585
	190.4	-21.6886	-17.822
	190.5	-30.6985	-16.1181
	190.6	1.9615	-22.6457
	190.7	-21.2575	-19.2905
	190.8	-21.3527	-16.7476
	190.9	-9.0891	-16.103
	191	-1.2964	-16.776
	191.1	-7.5605	-18.5467
	191.2	-6.7653	-11.9378
	191.3	-4.2259	-15.4804
	191.4	-11.2134	-13.8554
	191.5	-11.5291	-14.518
	191.6	-20.0458	-15.5464
	191.7	-3.8961	-20.4088
	191.8	-11.4804	-19.5511
	191.9	-12.4797	-21.1306
	192	-6.3897	-16.7646
	192.1	1.3056	-12.869
	192.2	0.371	-12.9235
	192.3	0.2625	-13.2442
	192.4	-8.823	-17.547
	192.5	3.4657	-19.3465
	192.6	4.7998	-15.2235
	192.7	6.8233	-17.6495
	192.8	-4.966	-13.8408
	192.9	-6.6837	-12.8741
	193	-10.3747	-14.9292
	193.1	-36.0017	-16.9429
	193.2	-11.7574	-16.8528
	193.3	-22.3959	-19.1931
	193.4	2.8954	-15.0628
	193.5	9.2409	-16.6373
	193.6	-2.0772	-19.3185
	193.7	-5.8641	-16.2773
	193.8	-23.1899	-14.0307
	193.9	10.4456	-15.0985
	194	3.2394	-16.6643
	194.1	-0.0365	-13.7399
	194.2	-16.7628	-17.165
	194.3	-5.7278	-14.2152
	194.4	-9.3232	-13.4649
	194.5	-1.8764	-16.7856
	194.6	0.139	-14.6068
	194.7	0.0692	-13.7651
	194.8	7.5302	-17.9786
	194.9	-1.9665	-16.9721
	195	-19.3452	-11.626
	195.1	-6.4099	-14.2771
	195.2	-0.5501	-17.5041
	195.3	8.8961	-14.2067
	195.4	-14.8207	-16.9461
	195.5	-10.9233	-16.7811
	195.6	8.4476	-15.973
	195.7	8.7204	-15.7417
	195.8	-3.8863	-18.2514
	195.9	1.5127	-17.0205
	196	-10.7637	-13.7788
	196.1	-13.8582	-15.5762
	196.2	-8.1789	-18.8468
	196.3	-0.6459	-12.8465
	196.4	-0.3188	-16.4032
	196.5	-6.2595	-14.1411
	196.6	1.1318	-14.5213
	196.7	-1.0076	-13.1645
	196.8	0.2041	-16.4805
	196.9	1.3526	-13.9691
	197	-2.6626	-13.0391
	197.1	0.2004	-8.3781
	197.2	-0.8504	-13.0373
	197.3	-2.1165	-14.763
	197.4	-35.0008	-13.9543
	197.5	-36.3008	-16.3974
	197.6	-22.7132	-14.4893
	197.7	-16.4009	-14.3609
	197.8	-21.3847	-15.0586
	197.9	-27.7406	-11.0413
	198	-22.8113	-16.2955
	198.1	7.5447	-15.3179
	198.2	0.526	-14.4519
	198.3	1.6163	-13.4316
	198.4	-5.1869	-10.0356
	198.5	-19.3015	-14.7718
	198.6	-11.3513	-19.1187
	198.7	-2.2102	-13.7753
	198.8	-2.6126	-14.1382
	198.9	-8.7162	-13.1745
	199	-3.7753	-18.0669
	199.1	-2.8831	-15.9607
	199.2	3.0796	-14.8175
	199.3	0.1354	-14.8699
	199.4	-5.3622	-12.6553
	199.5	-15.9028	-14.8201
	199.6	-14.1409	-18.1756
	199.7	-12.4374	-14.5933
	199.8	-23.4769	-16.9361
	199.9	-8.7345	-19.7568
	200	-7.6326	-18.656

## Sheet: Fig.4e
	x	y
	Site	ΔE (kcal/mol)
	D305	-3.5307
	E356	-0.317509
	D424	-1.76448

## Sheet: Fig.5c
	x	y
	s	ΔG (kcal/mol)
	0	0.22174
	0.011494	0.12151
	0.022989	0.04859
	0.034483	0.00298
	0.045977	0
	0.057471	0.00256
	0.068966	0.01813
	0.08046	0.03811
	0.091954	0.05451
	0.103448	0.06058
	0.114943	0.06041
	0.126437	0.05586
	0.137931	0.05474
	0.149425	0.05549
	0.16092	0.0479
	0.172414	0.03776
	0.183908	0.03213
	0.195402	0.03374
	0.206897	0.04322
	0.218391	0.055
	0.229885	0.06846
	0.241379	0.09127
	0.252874	0.12561
	0.264368	0.16517
	0.275862	0.20274
	0.287356	0.23006
	0.298851	0.2485
	0.310345	0.26145
	0.321839	0.27228
	0.333333	0.28184
	0.344828	0.29015
	0.356322	0.29598
	0.367816	0.29664
	0.37931	0.29216
	0.390805	0.28856
	0.402299	0.28439
	0.413793	0.28286
	0.425287	0.28777
	0.436782	0.29758
	0.448276	0.30728
	0.45977	0.3172
	0.471264	0.32429
	0.482759	0.32981
	0.494253	0.3334
	0.505747	0.33605
	0.517241	0.33134
	0.528736	0.31746
	0.54023	0.29978
	0.551724	0.2819
	0.563218	0.26324
	0.574713	0.24932
	0.586207	0.2335
	0.597701	0.21463
	0.609195	0.19313
	0.62069	0.17076
	0.632184	0.14995
	0.643678	0.13304
	0.655172	0.12184
	0.666667	0.12532
	0.678161	0.14881
	0.689655	0.19499
	0.701149	0.26733
	0.712644	0.36142
	0.724138	0.47345
	0.735632	0.60558
	0.747126	0.75856
	0.758621	0.93112
	0.770115	1.11194
	0.781609	1.29189
	0.793103	1.45623
	0.804598	1.59489
	0.816092	1.70042
	0.827586	1.7769
	0.83908	1.83837
	0.850575	1.89355
	0.862069	1.93767
	0.873563	1.95285
	0.885057	1.91993
	0.896552	1.82487
	0.908046	1.68196
	0.91954	1.5209
	0.931034	1.37041
	0.942529	1.25811
	0.954023	1.18842
	0.965517	1.13586
	0.977011	1.10943
	0.988506	1.10631
	1	1.12648

## Sheet: Fig.5e
		WT	P268A
	x	y	y
	d2 (Å)	ΔG (kcal/mol)	ΔG (kcal/mol)
	8	4.57052	13.3511
	8.1	4.37918	12.7614
	8.2	4.18911	12.219
	8.3	3.98223	11.7198
	8.4	3.77498	11.2586
	8.5	3.56417	10.8172
	8.6	3.36441	10.3786
	8.7	3.16962	9.93917
	8.8	2.9955	9.49524
	8.9	2.83169	9.0446
	9	2.67565	8.58258
	9.1	2.52754	8.11584
	9.2	2.3848	7.66412
	9.3	2.24689	7.23161
	9.4	2.11763	6.82238
	9.5	1.99659	6.43814
	9.6	1.88228	6.08733
	9.7	1.77441	5.76307
	9.8	1.67994	5.46673
	9.9	1.58702	5.19866
	10	1.50169	4.95814
	10.1	1.42989	4.74309
	10.2	1.36303	4.5644
	10.3	1.29915	4.40366
	10.4	1.23679	4.25673
	10.5	1.17979	4.11764
	10.6	1.12908	3.98683
	10.7	1.08499	3.85533
	10.8	1.04258	3.72772
	10.9	1.00425	3.59332
	11	0.972546	3.44655
	11.1	0.950709	3.29486
	11.2	0.929464	3.13303
	11.3	0.91387	2.96848
	11.4	0.900057	2.80048
	11.5	0.890395	2.63544
	11.6	0.884676	2.48035
	11.7	0.876431	2.33643
	11.8	0.876724	2.1976
	11.9	0.88243	2.05675
	12	0.885272	1.92719
	12.1	0.885556	1.80564
	12.2	0.884212	1.69448
	12.3	0.883391	1.59
	12.4	0.885907	1.49477
	12.5	0.885093	1.40925
	12.6	0.875678	1.32876
	12.7	0.873981	1.24622
	12.8	0.873329	1.17318
	12.9	0.868541	1.10318
	13	0.870694	1.02684
	13.1	0.872702	0.952913
	13.2	0.878002	0.881424
	13.3	0.889913	0.809535
	13.4	0.89517	0.752074
	13.5	0.902716	0.702923
	13.6	0.905143	0.651706
	13.7	0.909012	0.611526
	13.8	0.909702	0.562059
	13.9	0.904239	0.522782
	14	0.90231	0.482437
	14.1	0.894609	0.44245
	14.2	0.87978	0.406636
	14.3	0.859338	0.375966
	14.4	0.83422	0.340488
	14.5	0.794708	0.315964
	14.6	0.754496	0.294695
	14.7	0.712145	0.275303
	14.8	0.668169	0.254565
	14.9	0.626599	0.23334
	15	0.585739	0.206781
	15.1	0.54285	0.180355
	15.2	0.50197	0.162929
	15.3	0.461747	0.148836
	15.4	0.423325	0.137671
	15.5	0.386798	0.122739
	15.6	0.343262	0.106827
	15.7	0.299189	0.092102
	15.8	0.2611	0.07907
	15.9	0.218997	0.066569
	16	0.183826	0.052766
	16.1	0.147974	0.03785
	16.2	0.11938	0.029224
	16.3	0.090856	0.019971
	16.4	0.064595	0.011187
	16.5	0.041193	0.005949
	16.6	0.027198	0
	16.7	0.021963	0.001247
	16.8	0.01036	0.001537
	16.9	0	0.006117
	17	0.001002	0.01591
	17.1	0.007116	0.028538
	17.2	0.011044	0.040108
	17.3	0.027426	0.049189
	17.4	0.044389	0.057803
	17.5	0.059599	0.073845
	17.6	0.076003	0.098737
	17.7	0.09857	0.133342
	17.8	0.119142	0.167381
	17.9	0.134627	0.200297
	18	0.148108	0.237241
	18.1	0.165336	0.281254
	18.2	0.179618	0.343711
	18.3	0.198687	0.4033
	18.4	0.220641	0.463444
	18.5	0.242937	0.530249
	18.6	0.267733	0.606226
	18.7	0.296349	0.682805
	18.8	0.321027	0.770262
	18.9	0.347529	0.861828
	19	0.374118	0.964315
	19.1	0.404477	1.06325
	19.2	0.442886	1.16517
	19.3	0.48692	1.27819
	19.4	0.535065	1.39503
	19.5	0.582993	1.51863
	19.6	0.635534	1.64789
	19.7	0.689305	1.77642
	19.8	0.746465	1.90708
	19.9	0.811829	2.05266
	20	0.896375	2.23383

## Sheet: Fig.6c
		Pose I	Pose II
	x	y	y
	Time (ns)	Distance (Å)	Distance (Å)
	0	10.9787	12.854
	0.1	10.597	12.3053
	0.2	10.5167	11.2426
	0.3	10.6689	11.8078
	0.4	10.4519	12.5991
	0.5	10.588	12.9827
	0.6	10.9661	11.842
	0.7	11.1064	12.5935
	0.8	10.7929	10.9485
	0.9	10.8482	12.376
	1	10.5578	10.96
	1.1	10.5551	10.9102
	1.2	10.7608	11.3852
	1.3	10.663	11.5635
	1.4	10.7232	10.5834
	1.5	10.4817	10.6663
	1.6	10.6429	12.0088
	1.7	10.9677	11.7461
	1.8	10.3229	11.5585
	1.9	10.5344	12.1383
	2	10.5947	11.7621
	2.1	10.5661	12.8476
	2.2	10.4208	11.9065
	2.3	10.507	12.8752
	2.4	10.664	12.5768
	2.5	10.8511	13.1176
	2.6	10.5098	13.8517
	2.7	10.4708	13.7798
	2.8	10.48	14.3317
	2.9	10.55	14.3993
	3	10.6359	12.7752
	3.1	10.601	14.1545
	3.2	10.9051	13.0189
	3.3	10.6214	14.2647
	3.4	10.4772	14.6512
	3.5	10.5666	16.5375
	3.6	10.5367	17.2075
	3.7	10.2531	16.566
	3.8	10.8533	16.7969
	3.9	10.6432	18.1031
	4	10.7101	17.285
	4.1	10.8162	16.8642
	4.2	10.6459	16.8485
	4.3	10.7834	18.0435
	4.4	10.6116	16.1334
	4.5	10.5255	15.8055
	4.6	10.8541	16.8955
	4.7	10.9164	18.5726
	4.8	10.8476	18.138
	4.9	11.3617	17.9064
	5	11.0255	19.2111
	5.1	10.9908	19.1085
	5.2	11.7319	18.1938
	5.3	11.7076	18.6526
	5.4	12.1644	20.3932
	5.5	11.1366	20.6099
	5.6	11.1092	19.1683
	5.7	11.6504	20.1825
	5.8	11.3486	19.1343
	5.9	11.1895	20.0398
	6	11.1253	20.6203
	6.1	11.5542	19.9555
	6.2	11.1087	20.3965
	6.3	11.415	20.2234
	6.4	10.9117	20.8192
	6.5	11.439	20.2361
	6.6	12.1933	19.8275
	6.7	11.4783	20.0073
	6.8	12.0248	20.3673
	6.9	11.6281	20.5653
	7	11.5465	20.076
	7.1	11.6253	19.4793
	7.2	11.7185	19.4724
	7.3	11.8476	20.1713
	7.4	11.4927	19.2321
	7.5	11.1288	19.1634
	7.6	11.825	19.4979
	7.7	11.9455	20.1559
	7.8	11.6634	20.0222
	7.9	11.6119	19.7089
	8	11.7332	19.9874
	8.1	12.0668	19.446
	8.2	11.4742	19.5369
	8.3	11.0012	19.6341
	8.4	11.569	20.0409
	8.5	11.9295	21.1648
	8.6	11.5086	19.7243
	8.7	11.2392	20.2654
	8.8	11.2146	19.9721
	8.9	11.0392	20.3142
	9	11.145	20.6712
	9.1	11.6463	20.1347
	9.2	11.8222	19.8897
	9.3	10.9598	20.6242
	9.4	10.7583	19.5622
	9.5	10.9213	20.748
	9.6	11.3731	19.7647
	9.7	10.9142	19.0899
	9.8	10.9281	20.1244
	9.9	10.6664	20.3991
	10	11.2194	20.9142
	10.1	11.1974	20.2028
	10.2	10.988	19.0337
	10.3	11.1776	18.7298
	10.4	10.9016	20.1029
	10.5	10.6494	19.222
	10.6	11.0204	20.788
	10.7	11.0893	19.543
	10.8	11.4555	20.5108
	10.9	11.9011	20.0088
	11	11.8483	20.6639
	11.1	11.4161	20.7946
	11.2	12.3455	20.3126
	11.3	11.9803	20.8442
	11.4	12.3918	20.4862
	11.5	13.0425	20.4015
	11.6	12.5195	20.6503
	11.7	12.7746	20.1702
	11.8	14.9902	20.0005
	11.9	13.9406	20.2947
	12	13.744	20.4609
	12.1	13.2769	19.6444
	12.2	12.7521	17.8888
	12.3	11.8811	18.4104
	12.4	13.5199	18.9944
	12.5	13.0325	17.6819
	12.6	12.8458	17.5705
	12.7	13.2307	17.5501
	12.8	13.0962	17.4095
	12.9	13.5446	16.3604
	13	13.7156	17.4133
	13.1	13.0822	18.2248
	13.2	13.704	17.9318
	13.3	13.372	18.9647
	13.4	13.8302	18.6433
	13.5	13.1365	18.2624
	13.6	13.1815	18.418
	13.7	13.5382	17.7618
	13.8	13.5249	17.7647
	13.9	13.72	17.4944
	14	13.4864	18.0806
	14.1	13.1326	18.2916
	14.2	13.4539	19.3647
	14.3	13.3856	19.7089
	14.4	13.7431	18.8497
	14.5	12.9974	17.4832
	14.6	13.8205	18.1192
	14.7	12.5234	18.0829
	14.8	12.2594	18.3883
	14.9	13.5925	18.1618
	15	13.1167	18.3364
	15.1	12.3884	17.7665
	15.2	12.9405	18.4135
	15.3	13.0358	17.9562
	15.4	13.1649	17.7733
	15.5	12.3523	18.3847
	15.6	12.8606	18.4932
	15.7	12.9494	18.8561
	15.8	12.3977	18.0605
	15.9	13.3108	18.2322
	16	14.9788	18.2671
	16.1	12.6822	18.2592
	16.2	12.7156	18.1882
	16.3	13.1889	18.3108
	16.4	15.7779	18.3352
	16.5	15.3858	18.9518
	16.6	13.2031	18.1799
	16.7	13.8792	18.3402
	16.8	13.2812	18.1559
	16.9	12.1356	17.7316
	17	12.2496	16.9147
	17.1	12.2877	16.9131
	17.2	12.7939	16.9349
	17.3	12.9602	16.8167
	17.4	12.8827	16.1068
	17.5	12.0096	16.8145
	17.6	10.9983	16.6726
	17.7	11.2499	18.6044
	17.8	11.0454	18.1182
	17.9	10.8365	17.6297
	18	9.92697	17.9865
	18.1	10.9309	17.2557
	18.2	10.7996	17.9575
	18.3	10.8255	17.0784
	18.4	10.8665	16.582
	18.5	10.7931	17.4929
	18.6	10.8213	17.6604
	18.7	10.7515	17.437
	18.8	10.3668	17.6788
	18.9	10.7707	17.6793
	19	10.6363	17.039
	19.1	10.684	17.8771
	19.2	11.4715	17.5808
	19.3	11.3647	17.9445
	19.4	10.9199	17.8108
	19.5	10.6506	17.789
	19.6	11.8091	17.8292
	19.7	10.9835	18.0074
	19.8	11.4024	18.7495
	19.9	11.3462	19.1398
	20	11.1662	19.9214
	20.1	10.7135	19.5113
	20.2	10.8978	19.3732
	20.3	10.2483	19.1361
	20.4	10.5421	19.3886
	20.5	10.9853	18.9888
	20.6	10.6706	19.5578
	20.7	10.2504	19.0814
	20.8	10.39	18.902
	20.9	10.4494	19.1104
	21	11.0148	19.2518
	21.1	11.2365	19.8688
	21.2	11.7316	19.1276
	21.3	11.633	19.5424
	21.4	11.251	19.3093
	21.5	11.2714	19.8579
	21.6	11.0257	20.2643
	21.7	11.407	20.0646
	21.8	10.7143	20.7273
	21.9	11.2293	20.2091
	22	11.0541	19.0479
	22.1	11.2624	19.6599
	22.2	11.47	19.4314
	22.3	11.4471	19.6828
	22.4	11.4932	19.104
	22.5	11.3814	20.8938
	22.6	11.2934	20.1257
	22.7	11.5813	19.3265
	22.8	11.2971	19.8853
	22.9	11.5157	20.1768
	23	11.5126	20.2231
	23.1	11.4683	20.4568
	23.2	11.1248	20.7207
	23.3	10.9944	20.7255
	23.4	11.3221	20.04
	23.5	11.3936	19.6241
	23.6	11.4894	19.6865
	23.7	12.1994	19.4923
	23.8	12.5928	19.5393
	23.9	11.7259	19.2719
	24	11.5412	19.8323
	24.1	11.6932	18.9194
	24.2	11.0318	19.6904
	24.3	11.3317	19.3768
	24.4	11.1176	19.6765
	24.5	11.0965	18.9849
	24.6	11.2228	19.1534
	24.7	11.1458	19.7425
	24.8	11.1279	20.0604
	24.9	11.2958	19.5881
	25	11.5441	20.0299
	25.1	11.413	19.1383
	25.2	11.6295	19.9436
	25.3	11.3787	20.6441
	25.4	11.5609	19.824
	25.5	11.6177	20.0687
	25.6	11.9624	19.91
	25.7	11.3757	19.6653
	25.8	11.6062	19.6705
	25.9	11.8554	19.6414
	26	11.8872	19.9442
	26.1	12.0406	20.3588
	26.2	11.8552	19.5232
	26.3	11.8003	20.1007
	26.4	11.987	20.5005
	26.5	10.9697	19.916
	26.6	11.656	20.44
	26.7	12.2331	20.2342
	26.8	12.083	20.4984
	26.9	11.8469	19.6241
	27	11.825	20.3715
	27.1	12.0383	20.0775
	27.2	11.9725	20.1326
	27.3	12.0704	20.3742
	27.4	12.7258	19.8461
	27.5	12.2001	20.3819
	27.6	12.3063	20.3583
	27.7	11.4135	19.8973
	27.8	11.7846	19.4338
	27.9	11.6274	20.4182
	28	11.5442	20.0934
	28.1	11.5089	19.575
	28.2	11.7508	19.1225
	28.3	11.7297	19.666
	28.4	11.8086	19.4112
	28.5	11.5858	19.728
	28.6	12.3791	19.7902
	28.7	12.2202	19.2178
	28.8	12.0875	20.1973
	28.9	11.8133	19.6246
	29	11.5584	20.4916
	29.1	11.5885	21.2289
	29.2	12.3242	20.337
	29.3	11.8244	21.0485
	29.4	11.8973	21.3241
	29.5	12.0598	20.7948
	29.6	11.6582	20.8039
	29.7	11.3251	20.7713
	29.8	11.5262	20.8152
	29.9	11.5411	20.8867
	30	11.9106	19.4179
	30.1	11.6143	19.9504
	30.2	12.4882	19.9041
	30.3	12.1226	20.0929
	30.4	11.9572	19.1961
	30.5	11.853	20.1222
	30.6	11.4647	20.5379
	30.7	11.3678	19.9863
	30.8	11.6653	19.9459
	30.9	11.7768	19.6022
	31	11.6906	20.0095
	31.1	11.7629	20.3927
	31.2	11.7695	20.4114
	31.3	11.7477	20.9885
	31.4	11.7251	20.7067
	31.5	12.0364	19.9884
	31.6	11.7153	20.0762
	31.7	11.5	17.8901
	31.8	11.9275	19.1288
	31.9	11.9039	19.7052
	32	11.7529	20.1796
	32.1	11.9836	19.9754
	32.2	11.8087	21.0606
	32.3	12.216	20.0955
	32.4	11.7197	20.2423
	32.5	11.7546	20.0421
	32.6	11.6211	19.9959
	32.7	11.3728	20.9131
	32.8	11.4247	20.26
	32.9	11.6622	20.2954
	33	12.1078	19.328
	33.1	11.7419	19.7131
	33.2	12.1139	20.1623
	33.3	11.9698	19.7041
	33.4	11.5447	20.7445
	33.5	11.0749	20.024
	33.6	11.5554	19.4882
	33.7	11.8716	19.1312
	33.8	11.3671	19.9125
	33.9	11.7764	19.418
	34	11.5179	19.9412
	34.1	11.276	18.7978
	34.2	11.6242	19.8031
	34.3	11.5711	19.3926
	34.4	12.2613	19.2016
	34.5	12.0758	19.1866
	34.6	12.1787	19.2669
	34.7	12.1301	18.4961
	34.8	12.6718	19.0475
	34.9	12.6528	19.5521
	35	13.131	19.4562
	35.1	12.3989	20.1186
	35.2	12.069	19.259
	35.3	12.3227	18.9891
	35.4	11.718	19.0844
	35.5	11.879	19.4125
	35.6	11.6482	19.6401
	35.7	11.4366	19.8434
	35.8	11.0737	19.7747
	35.9	11.4858	18.8087
	36	11.3877	19.5718
	36.1	11.6329	19.2126
	36.2	11.3376	19.2778
	36.3	11.0092	19.357
	36.4	11.5674	20.1038
	36.5	11.9309	19.7701
	36.6	11.8559	19.0342
	36.7	11.8354	20.1059
	36.8	11.6595	19.3125
	36.9	11.6488	20.1132
	37	12.051	20.0513
	37.1	11.6901	19.9837
	37.2	11.366	19.4512
	37.3	11.6233	19.6909
	37.4	11.3601	19.1254
	37.5	11.1472	19.284
	37.6	11.252	19.8168
	37.7	11.2184	19.4651
	37.8	11.2892	20.4275
	37.9	11.2525	19.7364
	38	11.2267	19.5623
	38.1	11.0571	19.669
	38.2	11.2764	19.6099
	38.3	11.216	19.9721
	38.4	11.1989	19.7796
	38.5	11.5803	19.6907
	38.6	11.1974	20.3032
	38.7	11.4331	19.87
	38.8	11.4932	19.8039
	38.9	11.2557	20.4754
	39	11.4651	18.9797
	39.1	11.366	20.1697
	39.2	11.4142	19.5288
	39.3	11.4608	19.4896
	39.4	11.3336	20.2092
	39.5	11.3047	20.3398
	39.6	11.3127	20.7459
	39.7	10.9068	19.8974
	39.8	11.3137	20.359
	39.9	11.3248	20.1408
	40	11.3203	20.2396
	40.1	11.6152	19.7093
	40.2	11.6917	19.5292
	40.3	11.4041	20.0356
	40.4	11.423	19.7342
	40.5	11.3004	19.8942
	40.6	11.3536	19.5043
	40.7	11.2026	19.1706
	40.8	11.6274	20.0715
	40.9	11.5261	20.0819
	41	11.2977	21.648
	41.1	11.2111	20.8066
	41.2	11.0622	20.935
	41.3	11.3275	21.5314
	41.4	11.5134	20.1524
	41.5	11.7297	20.4742
	41.6	11.468	20.3752
	41.7	11.1331	19.0495
	41.8	11.3702	19.5998
	41.9	11.453	20.4024
	42	11.517	20.0755
	42.1	11.4819	19.8918
	42.2	11.4444	19.6516
	42.3	11.3016	19.761
	42.4	11.3864	20.1034
	42.5	11.5012	19.6521
	42.6	11.6738	19.606
	42.7	11.3316	20.4509
	42.8	10.9839	19.854
	42.9	11.3872	20.3284
	43	11.4896	20.4791
	43.1	11.4478	20.0025
	43.2	11.2811	19.9583
	43.3	11.3075	20.3893
	43.4	11.2464	19.3876
	43.5	11.3773	20.0505
	43.6	11.3494	20.8128
	43.7	11.5554	20.0962
	43.8	11.5984	19.7865
	43.9	11.4227	20.0139
	44	11.3094	20.1808
	44.1	11.6627	19.7322
	44.2	11.1755	20.1216
	44.3	11.5411	20.025
	44.4	11.3197	20.0257
	44.5	11.0727	20.1649
	44.6	11.248	20.1341
	44.7	11.4109	20.0765
	44.8	11.1062	19.4456
	44.9	12.0015	20.2061
	45	11.3171	20.6231
	45.1	11.443	21.1366
	45.2	11.5725	20.6403
	45.3	11.276	20.7592
	45.4	11.5161	19.4957
	45.5	11.2485	20.2817
	45.6	10.9935	19.8289
	45.7	10.897	19.8512
	45.8	11.3996	20.5412
	45.9	11.6364	20.6815
	46	11.233	20.07
	46.1	11.2327	19.7371
	46.2	11.0167	19.8816
	46.3	11.1794	19.1868
	46.4	11.2085	20.8343
	46.5	11.124	19.8282
	46.6	11.5951	19.9262
	46.7	11.35	20.4238
	46.8	11.6102	20.0302
	46.9	11.4953	19.1757
	47	11.8936	20.6461
	47.1	11.6826	20.0335
	47.2	11.2821	19.7423
	47.3	11.1837	19.8941
	47.4	11.4004	20.2796
	47.5	11.6756	20.3995
	47.6	11.5952	19.9385
	47.7	11.7402	20.2468
	47.8	11.494	19.5289
	47.9	11.4714	19.7434
	48	11.5006	19.6318
	48.1	11.6964	19.44
	48.2	11.8534	19.6443
	48.3	11.5021	19.3183
	48.4	11.6779	19.805
	48.5	11.3246	19.8599
	48.6	11.7333	20.0175
	48.7	11.4531	19.9934
	48.8	10.9236	19.9342
	48.9	11.4443	19.9221
	49	11.8067	19.8015
	49.1	11.4439	19.9943
	49.2	11.8252	19.5848
	49.3	11.9047	19.8245
	49.4	11.7578	19.4894
	49.5	11.8734	19.1561
	49.6	12.1839	19.4915
	49.7	11.801	19.9008
	49.8	11.5342	19.2973
	49.9	11.68	20.386
	50	11.9965	21.0759
	50.1	11.5439	20.675
	50.2	11.5335	20.3462
	50.3	11.7954	21.0612
	50.4	11.4261	20.5142
	50.5	11.3953	20.4226
	50.6	11.1942	21.0645
	50.7	11.2816	20.6844
	50.8	11.4812	20.363
	50.9	11.4469	20.0701
	51	11.4293	19.0545
	51.1	11.5345	20.2379
	51.2	11.6061	19.829
	51.3	11.8256	20.2713
	51.4	11.7301	20.2943
	51.5	11.7474	19.3976
	51.6	11.3216	19.8773
	51.7	11.6179	20.757
	51.8	11.6633	20.1813
	51.9	11.1582	20.0136
	52	11.5356	19.8654
	52.1	11.2703	19.7006
	52.2	11.4447	20.4749
	52.3	11.4248	20.1499
	52.4	11.5673	19.2813
	52.5	11.5778	20.4729
	52.6	11.3985	20.1004
	52.7	11.1032	20.3548
	52.8	11.7169	19.5953
	52.9	11.6586	20.5879
	53	11.474	19.5236
	53.1	12.1158	19.6916
	53.2	11.7709	20.1076
	53.3	11.3824	19.5729
	53.4	11.4546	20.8867
	53.5	11.3508	20.0023
	53.6	11.4167	20.0619
	53.7	11.4756	20.0899
	53.8	11.1228	20.0061
	53.9	11.4206	20.4931
	54	11.1088	20.1236
	54.1	11.2078	20.4337
	54.2	11.532	20.6526
	54.3	11.0789	20.6935
	54.4	11.3922	20.4114
	54.5	11.2647	19.7564
	54.6	11.1823	20.6183
	54.7	11.7314	19.9453
	54.8	11.4259	20.4952
	54.9	11.495	21.1841
	55	11.2517	20.1303
	55.1	11.4509	20.3848
	55.2	12.0883	19.9982
	55.3	11.4264	20.2213
	55.4	12.071	19.9378
	55.5	11.4331	20.5656
	55.6	11.5443	20.5064
	55.7	11.5106	20.8588
	55.8	11.7607	20.3392
	55.9	11.6169	19.7765
	56	11.5665	20.0834
	56.1	11.5869	19.8915
	56.2	11.8376	19.397
	56.3	11.397	20.5963
	56.4	11.4853	20.0845
	56.5	11.7625	19.2806
	56.6	11.7388	19.6315
	56.7	11.7095	19.7813
	56.8	12.455	20.3146
	56.9	12.4004	20.5112
	57	12.6386	19.6724
	57.1	12.6164	20.4697
	57.2	12.6021	20.3629
	57.3	12.8799	21.0232
	57.4	13.1948	20.7477
	57.5	12.7107	20.6442
	57.6	12.8305	20.4524
	57.7	12.862	21.4039
	57.8	12.3404	20.0682
	57.9	12.1888	20.1234
	58	12.7311	20.271
	58.1	12.553	20.5679
	58.2	12.1225	20.2398
	58.3	11.968	19.7551
	58.4	12.058	19.6984
	58.5	12.0093	20.1676
	58.6	12.6319	20.6297
	58.7	12.3044	20.4745
	58.8	11.8159	20.7154
	58.9	11.6024	20.5416
	59	12.0334	20.9607
	59.1	12.2233	19.7584
	59.2	12.0032	19.8872
	59.3	11.8758	20.243
	59.4	12.2824	20.2199
	59.5	11.8394	20.3342
	59.6	12.0639	20.7179
	59.7	11.5237	20.065
	59.8	11.8078	20.1001
	59.9	11.5363	21.0709
	60	11.2109	20.9735
	60.1	11.1975	20.0529
	60.2	11.009	20.704
	60.3	11.6211	21.7064
	60.4	11.3191	20.846
	60.5	11.2848	21.2422
	60.6	11.4087	20.9641
	60.7	10.5125	20.5241
	60.8	10.7686	20.151
	60.9	10.8735	19.527
	61	11.042	20.3262
	61.1	11.1658	20.5903
	61.2	11.8656	19.2291
	61.3	11.8142	19.1798
	61.4	10.994	19.6478
	61.5	11.4435	19.8966
	61.6	11.397	21.0038
	61.7	10.942	21.4207
	61.8	11.096	21.1952
	61.9	11.0101	21.2545
	62	10.7987	21.5558
	62.1	11.7328	21.019
	62.2	10.7991	21.0189
	62.3	10.9216	21.541
	62.4	11.1689	21.5256
	62.5	11.2924	21.0746
	62.6	11.0254	20.6622
	62.7	11.7197	20.3462
	62.8	12.126	21.3958
	62.9	12.8696	20.8242
	63	12.3873	20.1278
	63.1	12.8039	20.7136
	63.2	12.2553	20.512
	63.3	12.6032	20.4656
	63.4	13.1413	20.4282
	63.5	13.5922	20.8195
	63.6	13.3207	19.8988
	63.7	12.8576	21.1597
	63.8	11.8396	19.874
	63.9	11.658	21.6989
	64	11.7396	20.7572
	64.1	11.937	21.1115
	64.2	12.1833	19.6569
	64.3	12.303	20.1915
	64.4	13.3302	18.8919
	64.5	14.1822	20.1157
	64.6	13.9719	20.7037
	64.7	14.2193	20.5009
	64.8	13.3034	19.9487
	64.9	13.5062	21.0028
	65	13.714	19.7284
	65.1	13.8695	19.5773
	65.2	13.8497	19.6396
	65.3	13.9849	19.9255
	65.4	13.2503	20.1935
	65.5	13.7724	20.0795
	65.6	13.2469	19.9983
	65.7	13.1087	19.0852
	65.8	13.3037	20.6746
	65.9	13.9718	20.2606
	66	14.2382	20.3677
	66.1	14.3654	20.4286
	66.2	13.6493	19.9354
	66.3	14.6665	19.5651
	66.4	14.4562	18.3213
	66.5	13.9536	19.0515
	66.6	14.0656	20.2794
	66.7	13.7791	20.6495
	66.8	14.2659	19.9385
	66.9	13.3675	20.1792
	67	13.5425	18.7137
	67.1	13.3632	20.1791
	67.2	13.4453	19.7644
	67.3	13.5725	19.7866
	67.4	13.6286	20.2594
	67.5	13.5542	20.9667
	67.6	14.5541	18.4049
	67.7	13.8675	19.9458
	67.8	13.7167	20.2095
	67.9	13.5318	19.5882
	68	13.7299	19.3171
	68.1	13.8778	19.5306
	68.2	13.448	19.0365
	68.3	13.395	19.2154
	68.4	13.7951	18.6685
	68.5	14.0985	19.3332
	68.6	13.6729	19.8134
	68.7	14.1099	20.2777
	68.8	14.4048	20.4844
	68.9	14.3202	19.9509
	69	13.6729	19.8222
	69.1	13.6079	19.7525
	69.2	14.0427	19.8816
	69.3	13.7983	20.0477
	69.4	13.7413	19.552
	69.5	14.056	20.2894
	69.6	14.1584	20.3865
	69.7	13.8427	21.3353
	69.8	14.4731	21.2207
	69.9	13.8822	21.283
	70	13.8048	20.4858
	70.1	13.3432	18.8085
	70.2	13.8406	18.51
	70.3	13.2371	19.3716
	70.4	13.0908	19.7777
	70.5	13.2838	19.2907
	70.6	13.888	19.8491
	70.7	13.8074	20.7027
	70.8	13.9106	20.4558
	70.9	14.0255	20.4111
	71	13.7248	20.1477
	71.1	14.0276	20.2205
	71.2	12.9438	19.6834
	71.3	13.6031	19.9593
	71.4	13.2972	20.3158
	71.5	13.666	20.3341
	71.6	14.0172	20.6942
	71.7	13.6883	20.1405
	71.8	12.8436	19.5479
	71.9	13.7165	21.1786
	72	13.4613	19.2518
	72.1	13.6977	20.4815
	72.2	13.6761	18.9866
	72.3	13.9272	19.7394
	72.4	13.2884	20.3712
	72.5	14.2283	20.1019
	72.6	13.5307	20.3448
	72.7	14.0412	20.6305
	72.8	14.567	19.9019
	72.9	13.7314	20.8441
	73	13.3205	20.2068
	73.1	14.3707	20.5065
	73.2	14.376	20.3064
	73.3	13.1796	18.7728
	73.4	13.8315	19.8084
	73.5	13.478	19.786
	73.6	13.3849	19.8253
	73.7	13.4646	19.929
	73.8	13.4907	20.8141
	73.9	14.2884	20.5876
	74	13.2867	20.5804
	74.1	13.8953	20.1363
	74.2	13.6804	19.9513
	74.3	13.8831	19.6132
	74.4	13.3285	20.1369
	74.5	13.5053	19.9808
	74.6	13.8696	19.5033
	74.7	13.8198	20.69
	74.8	13.5885	19.5493
	74.9	13.6266	19.91
	75	13.0367	20.4476
	75.1	14.0524	20.1152
	75.2	13.799	20.455
	75.3	13.9526	20.0658
	75.4	14.0811	21.1595
	75.5	14.1674	20.6706
	75.6	13.1812	20.038
	75.7	13.1027	19.9077
	75.8	14.008	20.3581
	75.9	15.3678	19.2849
	76	16.146	19.7799
	76.1	16.1905	20.6544
	76.2	15.9151	21.224
	76.3	15.483	20.8557
	76.4	14.8819	21.0999
	76.5	14.1822	20.2844
	76.6	13.7552	21.2826
	76.7	14.0774	21.8197
	76.8	14.4056	21.5192
	76.9	13.7674	20.395
	77	13.7341	21.2148
	77.1	12.9702	20.9573
	77.2	13.1074	19.5461
	77.3	12.8037	20.4981
	77.4	12.8884	20.7879
	77.5	13.3581	20.6455
	77.6	13.7414	19.5901
	77.7	13.2838	21.3017
	77.8	13.6843	21.2096
	77.9	14.8185	19.6345
	78	13.9388	20.029
	78.1	13.9387	20.698
	78.2	13.8151	20.7878
	78.3	13.6252	20.6994
	78.4	13.16	20.6341
	78.5	13.0373	19.667
	78.6	13.0924	20.8612
	78.7	14.17	19.9971
	78.8	13.7293	19.2569
	78.9	14.4947	20.3733
	79	14.1356	20.638
	79.1	14.8996	20.0664
	79.2	15.3898	20.0427
	79.3	17.213	19.8042
	79.4	17.3292	20.3404
	79.5	17.4644	20.4899
	79.6	17.8567	20.9285
	79.7	17.3411	21.1596
	79.8	16.421	21.7769
	79.9	17.0561	22.3071
	80	18.4708	20.2793
	80.1	18.3802	20.6591
	80.2	18.026	20.9508
	80.3	17.7072	20.7581
	80.4	16.7511	21.219
	80.5	16.7632	21.2471
	80.6	16.9735	20.4188
	80.7	17.2638	21.2564
	80.8	18.2766	20.6319
	80.9	18.1028	20.6609
	81	17.7759	20.4926
	81.1	19.0462	19.618
	81.2	18.5258	19.963
	81.3	20.2505	19.7805
	81.4	18.8708	20.1348
	81.5	19.7639	19.8996
	81.6	19.8425	20.5502
	81.7	18.6882	21.4102
	81.8	19.6064	19.8312
	81.9	19.1682	19.8619
	82	19.8037	20.5962
	82.1	20.1134	20.3036
	82.2	20.1919	20.4902
	82.3	20.719	20.1326
	82.4	20.7992	19.8164
	82.5	21.354	20.309
	82.6	20.9273	20.531
	82.7	22.2812	21.0652
	82.8	22.5212	20.1269
	82.9	22.7678	19.5724
	83	22.2463	20.0578
	83.1	22.1955	20.3124
	83.2	22.5316	19.8547
	83.3	22.7934	20.2651
	83.4	23.4206	19.414
	83.5	23.7466	19.8236
	83.6	22.8222	20.6161
	83.7	22.6038	20.8074
	83.8	22.311	20.6627
	83.9	21.649	20.6916
	84	22.3298	20.8863
	84.1	22.4967	20.8497
	84.2	22.4254	20.4508
	84.3	22.3813	20.0236
	84.4	20.761	20.2515
	84.5	19.8361	20.0489
	84.6	20.24	19.7273
	84.7	19.6515	19.6869
	84.8	18.5394	19.6261
	84.9	18.8064	20.4112
	85	19.0847	20.4767
	85.1	18.8975	21.5278
	85.2	19.0762	20.3396
	85.3	19.2942	20.1891
	85.4	17.8497	21.2122
	85.5	17.7121	19.6998
	85.6	18.5652	19.706
	85.7	18.2333	20.2154
	85.8	18.7921	19.9255
	85.9	19.0285	19.8757
	86	19.207	20.7007
	86.1	19.616	21.156
	86.2	19.4261	19.9487
	86.3	19.4049	20.1488
	86.4	18.6103	20.3842
	86.5	18.1008	20.3941
	86.6	18.2308	21.4311
	86.7	17.7773	22.389
	86.8	18.0425	22.4297
	86.9	18.1666	20.2828
	87	17.8747	20.7881
	87.1	17.0706	19.832
	87.2	18.4796	20.5256
	87.3	18.6558	20.3638
	87.4	18.3886	20.5337
	87.5	18.8376	20.7208
	87.6	18.41	19.3467
	87.7	19.0945	20.3309
	87.8	18.3715	19.0597
	87.9	17.8678	19.954
	88	18.4193	19.502
	88.1	18.5063	19.4485
	88.2	18.2057	19.9223
	88.3	18.149	19.7296
	88.4	18.3223	20.4408
	88.5	18.7539	20.7275
	88.6	18.2735	20.3828
	88.7	18.1647	20.9356
	88.8	17.8991	20.0322
	88.9	18.816	19.8853
	89	19.039	20.2292
	89.1	18.4424	20.6303
	89.2	18.0929	19.9447
	89.3	18.6643	20.4151
	89.4	19.0761	20.6257
	89.5	19.1339	20.0381
	89.6	19.2853	19.4587
	89.7	18.6814	20.3033
	89.8	18.9551	20.2279
	89.9	19.353	20.5958
	90	18.7542	20.7067
	90.1	18.8686	21.5691
	90.2	18.566	21.3969
	90.3	18.2553	22.1382
	90.4	17.5587	21.5366
	90.5	17.0939	20.599
	90.6	17.1556	21.939
	90.7	17.2763	19.9002
	90.8	17.2928	21.1003
	90.9	18.2548	21.3736
	91	18.996	20.3616
	91.1	19.3787	22.0102
	91.2	18.9952	21.942
	91.3	18.8265	20.7575
	91.4	19.219	20.657
	91.5	18.2981	20.1149
	91.6	17.6101	20.5071
	91.7	18.3736	20.4987
	91.8	18.5016	20.0967
	91.9	17.9184	20.3109
	92	17.6811	19.7914
	92.1	18.5862	20.8605
	92.2	18.9172	21.0799
	92.3	19.2778	19.82
	92.4	19.323	20.2592
	92.5	19.8948	19.9286
	92.6	18.8675	20.4346
	92.7	18.9362	20.3044
	92.8	18.277	20.3008
	92.9	17.1714	20.0398
	93	17.3041	19.971
	93.1	18.2745	20.065
	93.2	17.6858	20.1006
	93.3	19.1817	19.415
	93.4	19.0483	20.2552
	93.5	18.6834	20.1855
	93.6	18.3501	19.725
	93.7	19.3329	19.5106
	93.8	19.0506	20.3037
	93.9	19.1658	19.7228
	94	19.3929	20.3161
	94.1	18.7609	20.605
	94.2	18.6262	20.2554
	94.3	18.8437	19.3522
	94.4	18.5599	20.4188
	94.5	18.7628	20.4763
	94.6	18.6218	19.9079
	94.7	18.8494	21.3099
	94.8	18.1253	20.1143
	94.9	18.5152	19.796
	95	18.433	20.0429
	95.1	18.1921	20.1836
	95.2	18.5669	21.0228
	95.3	18.3587	20.0364
	95.4	18.6244	20.451
	95.5	18.5755	20.14
	95.6	18.098	19.961
	95.7	19.3614	20.4701
	95.8	19.0722	19.5217
	95.9	19.488	19.381
	96	19.0765	20.2873
	96.1	19.1849	19.6311
	96.2	19.6629	20.3062
	96.3	19.4101	20.5529
	96.4	19.2841	19.941
	96.5	19.9568	20.6794
	96.6	19.8024	20.6336
	96.7	19.6192	19.7488
	96.8	19.6001	19.4645
	96.9	19.6677	19.4484
	97	19.6619	19.3215
	97.1	19.0246	20.2394
	97.2	19.3256	20.3363
	97.3	18.34	20.3718
	97.4	19.6513	21.3061
	97.5	19.4398	20.9281
	97.6	18.323	20.6034
	97.7	18.3945	20.5281
	97.8	18.2845	19.609
	97.9	18.4169	20.0992
	98	19.1277	18.8326
	98.1	19.394	18.4118
	98.2	19.0189	18.3272
	98.3	19.8478	18.6805
	98.4	18.8356	20.2885
	98.5	20.154	20.0992
	98.6	19.543	20.218
	98.7	19.1581	19.6088
	98.8	19.4297	20.4557
	98.9	19.1746	20.0227
	99	20.2455	19.9133
	99.1	21.4425	20.2221
	99.2	21.4381	20.1444
	99.3	22.0183	20.2247
	99.4	21.8146	20.1803
	99.5	21.4963	20.1049
	99.6	21.4643	20.8221
	99.7	20.9341	19.5929
	99.8	19.202	20.4106
	99.9	20.7726	20.2798
	100	22.1335	20.4517

## Sheet: Fig.6d
	x	y
	Time (ns)	ΔE (kcal/mol)
	0	-138.424
	0.1	-146.899
	0.2	-148.272
	0.3	-144.062
	0.4	-149.154
	0.5	-131.306
	0.6	-119.695
	0.7	-124.646
	0.8	-142.034
	0.9	-143.457
	1	-156.594
	1.1	-132.05
	1.2	-152.224
	1.3	-140.754
	1.4	-125.957
	1.5	-134.416
	1.6	-136.89
	1.7	-145.03
	1.8	-146.916
	1.9	-141.902
	2	-118.739
	2.1	-137.766
	2.2	-145.738
	2.3	-128.294
	2.4	-124.729
	2.5	-133.158
	2.6	-128.251
	2.7	-131.999
	2.8	-140.888
	2.9	-152.81
	3	-136.055
	3.1	-134.069
	3.2	-136.798
	3.3	-125.657
	3.4	-147.711
	3.5	-147.919
	3.6	-153.575
	3.7	-110.86
	3.8	-137.216
	3.9	-174.155
	4	-148.497
	4.1	-130.005
	4.2	-139.469
	4.3	-147.947
	4.4	-154.216
	4.5	-143.706
	4.6	-153.216
	4.7	-148.867
	4.8	-124.757
	4.9	-160.425
	5	-140.515
	5.1	-94.9314
	5.2	-105.683
	5.3	-119.404
	5.4	-112.388
	5.5	-106.207
	5.6	-80.3442
	5.7	-87.3995
	5.8	-96.8476
	5.9	-88.5893
	6	-102.442
	6.1	-60.1276
	6.2	-80.7145
	6.3	-79.0826
	6.4	-90.5701
	6.5	-71.433
	6.6	-96.814
	6.7	-94.3097
	6.8	-86.5357
	6.9	-93.1476
	7	-107.38
	7.1	-109.201
	7.2	-94.9715
	7.3	-114.849
	7.4	-95.1553
	7.5	-108.571
	7.6	-107.864
	7.7	-99.8902
	7.8	-98.3562
	7.9	-110.62
	8	-114.183
	8.1	-116.728
	8.2	-79.871
	8.3	-114.602
	8.4	-120.466
	8.5	-115.541
	8.6	-76.6706
	8.7	-96.0015
	8.8	-107.194
	8.9	-116.258
	9	-101.291
	9.1	-104.802
	9.2	-105.901
	9.3	-127.11
	9.4	-95.3191
	9.5	-85.4909
	9.6	-91.3453
	9.7	-117.612
	9.8	-102.899
	9.9	-85.5972
	10	-99.3369
	10.1	-118.371
	10.2	-78.4837
	10.3	-95.6514
	10.4	-74.6946
	10.5	-95.6167
	10.6	-93.1009
	10.7	-64.2028
	10.8	-71.6951
	10.9	-66.9842
	11	-50.2775
	11.1	-45.1615
	11.2	-42.6655
	11.3	-52.8901
	11.4	-47.8276
	11.5	-38.1799
	11.6	-57.8382
	11.7	-37.6502
	11.8	-40.7096
	11.9	-48.4866
	12	-46.8701
	12.1	-62.404
	12.2	-57.1773
	12.3	-68.4589
	12.4	-55.8821
	12.5	-68.1553
	12.6	-51.3087
	12.7	-60.7616
	12.8	-71.0748
	12.9	-51.2453
	13	-58.39
	13.1	-80.0513
	13.2	-49.9434
	13.3	-54.3296
	13.4	-49.1498
	13.5	-61.8968
	13.6	-50.09
	13.7	-66.1825
	13.8	-62.6641
	13.9	-75.18
	14	-65.992
	14.1	-51.6781
	14.2	-55.3016
	14.3	-43.9218
	14.4	-59.5188
	14.5	-61.492
	14.6	-63.329
	14.7	-48.8584
	14.8	-46.6559
	14.9	-54.8006
	15	-58.8188
	15.1	-70.4552
	15.2	-51.2866
	15.3	-39.5132
	15.4	-53.7146
	15.5	-45.5324
	15.6	-36.3561
	15.7	-53.4611
	15.8	-32.8304
	15.9	-26.6857
	16	-20.2662
	16.1	-31.5888
	16.2	-9.2984
	16.3	-21.2229
	16.4	-54.933
	16.5	-48.9406
	16.6	-33.7696
	16.7	-55.9957
	16.8	-46.6473
	16.9	-57.0568
	17	-61.5682
	17.1	-57.1172
	17.2	-108.622
	17.3	-100.448
	17.4	-85.1439
	17.5	-112.715
	17.6	-109.233
	17.7	-108.232
	17.8	-91.2979
	17.9	-112.382
	18	-86.0826
	18.1	-98.8437
	18.2	-68.6531
	18.3	-99.2625
	18.4	-84.9193
	18.5	-89.9719
	18.6	-99.0187
	18.7	-81.4222
	18.8	-86.3668
	18.9	-80.9404
	19	-85.5763
	19.1	-81.1216
	19.2	-85.8681
	19.3	-97.7546
	19.4	-86.5959
	19.5	-73.5331
	19.6	-120.276
	19.7	-116.508
	19.8	-111.701
	19.9	-105.683
	20	-125.414
	20.1	-124.651
	20.2	-114.595
	20.3	-86.7397
	20.4	-112.983
	20.5	-113.275
	20.6	-96.8514
	20.7	-109.666
	20.8	-94.5216
	20.9	-67.7554
	21	-77.8503
	21.1	-72.525
	21.2	-112.462
	21.3	-115.396
	21.4	-123.365
	21.5	-133.27
	21.6	-139.234
	21.7	-161.427
	21.8	-129.003
	21.9	-102.15
	22	-115.903
	22.1	-133.433
	22.2	-125.819
	22.3	-130.319
	22.4	-110.536
	22.5	-122.365
	22.6	-118.388
	22.7	-143.957
	22.8	-127.229
	22.9	-116.882
	23	-100.182
	23.1	-123.381
	23.2	-111.971
	23.3	-131.342
	23.4	-93.3294
	23.5	-68.8765
	23.6	-50.3526
	23.7	-69.1074
	23.8	-55.6376
	23.9	-61.4419
	24	-100.71
	24.1	-114.458
	24.2	-94.806
	24.3	-90.3067
	24.4	-102.233
	24.5	-101.525
	24.6	-104.001
	24.7	-124.641
	24.8	-103.752
	24.9	-128.384
	25	-119.925
	25.1	-93.6457
	25.2	-138.72
	25.3	-96.8917
	25.4	-114.714
	25.5	-119.901
	25.6	-115.757
	25.7	-103.547
	25.8	-132.95
	25.9	-113.5
	26	-124.863
	26.1	-96.4958
	26.2	-147.381
	26.3	-94.4248
	26.4	-107.919
	26.5	-99.2684
	26.6	-103.202
	26.7	-114.796
	26.8	-99.2322
	26.9	-93.914
	27	-97.8196
	27.1	-93.2297
	27.2	-94.5304
	27.3	-92.5095
	27.4	-94.4483
	27.5	-93.7498
	27.6	-128.802
	27.7	-101.203
	27.8	-101.483
	27.9	-106.948
	28	-93.8859
	28.1	-99.8549
	28.2	-111.925
	28.3	-89.4
	28.4	-91.2589
	28.5	-101.745
	28.6	-82.1814
	28.7	-104.51
	28.8	-112.284
	28.9	-110.691
	29	-99.7982
	29.1	-105.632
	29.2	-97.2058
	29.3	-81.5579
	29.4	-98.6612
	29.5	-79.7561
	29.6	-89.2569
	29.7	-77.8695
	29.8	-96.7341
	29.9	-87.5917
	30	-84.2067
	30.1	-71.0973
	30.2	-81.3554
	30.3	-87.9311
	30.4	-87.9995
	30.5	-70.4079
	30.6	-92.3602
	30.7	-101.836
	30.8	-96.6249
	30.9	-90.9722
	31	-104.86
	31.1	-94.9549
	31.2	-102.478
	31.3	-89.8399
	31.4	-129.299
	31.5	-124.672
	31.6	-98.6746
	31.7	-98.9122
	31.8	-97.9383
	31.9	-75.2207
	32	-90.7795
	32.1	-98.5016
	32.2	-99.549
	32.3	-78.2917
	32.4	-90.2006
	32.5	-103.301
	32.6	-118.218
	32.7	-127.192
	32.8	-116.6
	32.9	-69.1017
	33	-64.3528
	33.1	-60.1298
	33.2	-60.6501
	33.3	-76.0779
	33.4	-94.7885
	33.5	-100.265
	33.6	-81.8324
	33.7	-79.2078
	33.8	-112.137
	33.9	-82.1888
	34	-95.3771
	34.1	-89.1837
	34.2	-105.132
	34.3	-83.827
	34.4	-86.2162
	34.5	-72.0836
	34.6	-65.7366
	34.7	-55.3744
	34.8	-66.57
	34.9	-77.731
	35	-81.3801
	35.1	-61.3081
	35.2	-67.3172
	35.3	-90.6157
	35.4	-69.8905
	35.5	-73.4801
	35.6	-63.5565
	35.7	-95.1384
	35.8	-85.2408
	35.9	-94.5242
	36	-88.7368
	36.1	-97.9748
	36.2	-104.543
	36.3	-93.946
	36.4	-94.1757
	36.5	-101.151
	36.6	-114.63
	36.7	-99.6921
	36.8	-111.061
	36.9	-66.1614
	37	-110.258
	37.1	-104.97
	37.2	-100.184
	37.3	-121.335
	37.4	-85.4401
	37.5	-60.7549
	37.6	-100.066
	37.7	-76.119
	37.8	-93.4312
	37.9	-106.226
	38	-99.2886
	38.1	-89.7586
	38.2	-86.8119
	38.3	-89.5236
	38.4	-71.5611
	38.5	-90.6041
	38.6	-102.952
	38.7	-95.5906
	38.8	-113.781
	38.9	-106.423
	39	-101.696
	39.1	-92.4597
	39.2	-117.231
	39.3	-104.309
	39.4	-105.252
	39.5	-91.8851
	39.6	-93.0187
	39.7	-85.8023
	39.8	-65.6196
	39.9	-88.4626
	40	-74.8281
	40.1	-85.0522
	40.2	-89.9437
	40.3	-94.5684
	40.4	-97.988
	40.5	-111.448
	40.6	-101.072
	40.7	-86.8895
	40.8	-108.506
	40.9	-109.941
	41	-92.5233
	41.1	-107.451
	41.2	-104.435
	41.3	-98.7643
	41.4	-107.598
	41.5	-90.3254
	41.6	-106.346
	41.7	-117.718
	41.8	-103.268
	41.9	-97.668
	42	-85.9711
	42.1	-105.921
	42.2	-107.799
	42.3	-114.422
	42.4	-111.994
	42.5	-119.323
	42.6	-116.454
	42.7	-114.257
	42.8	-112.217
	42.9	-105.747
	43	-98.6245
	43.1	-110.19
	43.2	-126.568
	43.3	-112.24
	43.4	-111.171
	43.5	-114.021
	43.6	-126.153
	43.7	-92.0593
	43.8	-115.421
	43.9	-122.549
	44	-121.488
	44.1	-113.673
	44.2	-118.908
	44.3	-124.01
	44.4	-126.823
	44.5	-119.587
	44.6	-120.276
	44.7	-112.115
	44.8	-122.106
	44.9	-127.984
	45	-94.9548
	45.1	-112.926
	45.2	-108.676
	45.3	-120.426
	45.4	-104.89
	45.5	-116.896
	45.6	-95.6845
	45.7	-77.6228
	45.8	-127.581
	45.9	-96.8855
	46	-112.079
	46.1	-136.499
	46.2	-117.428
	46.3	-120.175
	46.4	-120.135
	46.5	-88.9396
	46.6	-87.7611
	46.7	-52.1113
	46.8	-91.0817
	46.9	-58.2189
	47	-60.4601
	47.1	-92.5782
	47.2	-90.8115
	47.3	-65.5382
	47.4	-74.6483
	47.5	-88.5688
	47.6	-82.4195
	47.7	-111.762
	47.8	-92.7715
	47.9	-85.9007
	48	-60.5763
	48.1	-58.2619
	48.2	-90.5672
	48.3	-93.3551
	48.4	-119.686
	48.5	-120.231
	48.6	-112.545
	48.7	-113.427
	48.8	-118.192
	48.9	-108.937
	49	-98.051
	49.1	-98.9667
	49.2	-102.19
	49.3	-92.6541
	49.4	-98.1962
	49.5	-102.651
	49.6	-124.843
	49.7	-110.198
	49.8	-90.8238
	49.9	-89.8456
	50	-104.648
	50.1	-110.62
	50.2	-101.69
	50.3	-110.605
	50.4	-101.259
	50.5	-97.0555
	50.6	-91.0978
	50.7	-114.272
	50.8	-99.172
	50.9	-110.167
	51	-106.862
	51.1	-85.8392
	51.2	-68.1736
	51.3	-99.7981
	51.4	-96.4053
	51.5	-94.6078
	51.6	-106.665
	51.7	-92.7644
	51.8	-109.779
	51.9	-97.1732
	52	-131.352
	52.1	-88.7654
	52.2	-87.8084
	52.3	-88.8935
	52.4	-95.1219
	52.5	-99.0264
	52.6	-132.985
	52.7	-110.699
	52.8	-91.0401
	52.9	-109.576
	53	-100.328
	53.1	-107.991
	53.2	-122.637
	53.3	-118.709
	53.4	-107.429
	53.5	-84.6225
	53.6	-106.621
	53.7	-96.2674
	53.8	-102.403
	53.9	-98.6259
	54	-118.58
	54.1	-130.487
	54.2	-132.471
	54.3	-76.9066
	54.4	-82.5121
	54.5	-48.4762
	54.6	-71.8723
	54.7	-82.6804
	54.8	-83.5998
	54.9	-72.9356
	55	-60.7928
	55.1	-62.9679
	55.2	-86.0354
	55.3	-69.462
	55.4	-78.7394
	55.5	-73.6988
	55.6	-67.7748
	55.7	-70.5837
	55.8	-95.4387
	55.9	-95.5159
	56	-77.8923
	56.1	-68.8349
	56.2	-81.9723
	56.3	-75.4648
	56.4	-76.2136
	56.5	-89.6214
	56.6	-43.595
	56.7	-60.4655
	56.8	-81.8147
	56.9	-59.4936
	57	-91.186
	57.1	-75.3353
	57.2	-72.3428
	57.3	-68.6438
	57.4	-71.5233
	57.5	-64.6287
	57.6	-60.865
	57.7	-68.1706
	57.8	-68.1595
	57.9	-67.9433
	58	-62.4489
	58.1	-70.517
	58.2	-56.714
	58.3	-53.9508
	58.4	-55.844
	58.5	-54.4868
	58.6	-57.0703
	58.7	-33.0533
	58.8	-67.2555
	58.9	-72.7265
	59	-72.2174
	59.1	-48.6674
	59.2	-52.0258
	59.3	-50.562
	59.4	-64.8844
	59.5	-71.8628
	59.6	-55.9183
	59.7	-68.5157
	59.8	-71.5319
	59.9	-85.6499
	60	-75.8211
	60.1	-85.033
	60.2	-76.2014
	60.3	-72.5102
	60.4	-84.6424
	60.5	-72.4687
	60.6	-68.0975
	60.7	-56.5378
	60.8	-55.9666
	60.9	-57.4212
	61	-59.2342
	61.1	-40.5543
	61.2	-76.931
	61.3	-64.9156
	61.4	-65.2936
	61.5	-57.7768
	61.6	-51.5106
	61.7	-55.4861
	61.8	-70.2276
	61.9	-52.7021
	62	-67.962
	62.1	-68.5913
	62.2	-76.9009
	62.3	-61.8686
	62.4	-71.378
	62.5	-63.6161
	62.6	-48.8707
	62.7	-51
	62.8	-25.3023
	62.9	-31.0491
	63	-24.6644
	63.1	-35.5064
	63.2	-25.2178
	63.3	-37.2343
	63.4	-33.923
	63.5	-22.4538
	63.6	-34.8097
	63.7	-49.077
	63.8	-59.8966
	63.9	-50.7057
	64	-34.5732
	64.1	-65.3724
	64.2	-68.9745
	64.3	-34.226
	64.4	-28.145
	64.5	-18.608
	64.6	-49.0336
	64.7	-63.2693
	64.8	-60.5178
	64.9	-56.1826
	65	-72.0067
	65.1	-62.2415
	65.2	-84.6684
	65.3	-49.1816
	65.4	-41.2531
	65.5	-45.0401
	65.6	-30.1758
	65.7	-40.2298
	65.8	-24.7212
	65.9	-25.5313
	66	-38.3076
	66.1	-30.1819
	66.2	-35.6261
	66.3	-45.9389
	66.4	-41.2078
	66.5	-27.7054
	66.6	-33.0553
	66.7	-22.2452
	66.8	-47.1138
	66.9	-37.3141
	67	-39.6791
	67.1	-45.3329
	67.2	-50.9356
	67.3	-35.079
	67.4	-48.0878
	67.5	-30.407
	67.6	-38.3653
	67.7	-21.7722
	67.8	-52.2598
	67.9	-41.8558
	68	-44.7623
	68.1	-39.2043
	68.2	-43.3075
	68.3	-41.9354
	68.4	-40.8882
	68.5	-42.5862
	68.6	-41.6028
	68.7	-44.6278
	68.8	-40.3012
	68.9	-53.0366
	69	-34.5257
	69.1	-50.4819
	69.2	-42.7926
	69.3	-26.8553
	69.4	-33.1495
	69.5	-39.3185
	69.6	-39.0721
	69.7	-41.7276
	69.8	-29.4919
	69.9	-47.3804
	70	-41.5952
	70.1	-38.0253
	70.2	-44.0501
	70.3	-59.5579
	70.4	-47.0387
	70.5	-32.8491
	70.6	-46.9937
	70.7	-47.5455
	70.8	-42.4196
	70.9	-46.6639
	71	-40.9112
	71.1	-46.404
	71.2	-38.0201
	71.3	-42.7205
	71.4	-53.572
	71.5	-44.1181
	71.6	-38.6801
	71.7	-51.8235
	71.8	-73.9739
	71.9	-39.5289
	72	-63.9534
	72.1	-35.6233
	72.2	-40.6725
	72.3	-43.1305
	72.4	-33.2301
	72.5	-42.9603
	72.6	-35.4306
	72.7	-58.5185
	72.8	-47.8513
	72.9	-49.9423
	73	-43.4061
	73.1	-51.8348
	73.2	-36.5144
	73.3	-40.4874
	73.4	-54.9016
	73.5	-35.6937
	73.6	-40.223
	73.7	-44.9988
	73.8	-40.1446
	73.9	-53.4585
	74	-60.4686
	74.1	-49.2395
	74.2	-42.6596
	74.3	-59.7422
	74.4	-52.3548
	74.5	-50.3342
	74.6	-55.0328
	74.7	-51.1989
	74.8	-41.9858
	74.9	-45.9785
	75	-50.1589
	75.1	-43.4943
	75.2	-40.0642
	75.3	-37.9868
	75.4	-45.7439
	75.5	-29.9276
	75.6	-47.3398
	75.7	-37.3469
	75.8	-13.931
	75.9	-29.5179
	76	-6.832
	76.1	-34.4094
	76.2	-15.5922
	76.3	-37.4062
	76.4	-35.6445
	76.5	-44.1797
	76.6	-44.1352
	76.7	-25.3719
	76.8	-36.5915
	76.9	-33.9569
	77	-49.2903
	77.1	-48.5141
	77.2	-18.725
	77.3	-28.6593
	77.4	-15.0951
	77.5	-31.291
	77.6	-23.8438
	77.7	-42.4015
	77.8	-34.8037
	77.9	-42.5147
	78	-45.7027
	78.1	-55.7728
	78.2	-36.4714
	78.3	-73.5702
	78.4	-56.5551
	78.5	-50.58
	78.6	-39.4114
	78.7	-29.6089
	78.8	-16.7707
	78.9	-16.1654
	79	-13.7555
	79.1	-19.1947
	79.2	-12.0187
	79.3	-9.3455
	79.4	-5.3189
	79.5	-1.5501
	79.6	-12.9927
	79.7	-4.0218
	79.8	-9.2273
	79.9	-8.8965
	80	-21.8574
	80.1	2.7936
	80.2	-16.1724
	80.3	-3.4873
	80.4	-9.185
	80.5	-12.7987
	80.6	-11.8473
	80.7	-0.3551
	80.8	-5.349
	80.9	-11.3463
	81	-5.6867
	81.1	-10.9655
	81.2	-9.7259
	81.3	-23.8735
	81.4	-39.7644
	81.5	-15.4894
	81.6	-14.9254
	81.7	-8.4541
	81.8	-18.8555
	81.9	-50.8627
	82	-57.92
	82.1	-53.4593
	82.2	-48.4395
	82.3	-34.198
	82.4	-68.4828
	82.5	-34.9637
	82.6	-54.5056
	82.7	-52.3477
	82.8	-29.4381
	82.9	-24.3126
	83	-25.5413
	83.1	-16.5115
	83.2	-15.5379
	83.3	-12.636
	83.4	-15.3779
	83.5	-30.5473
	83.6	-16.3737
	83.7	-16.749
	83.8	-17.088
	83.9	-27.8845
	84	-15.0105
	84.1	-13.2569
	84.2	-21.6813
	84.3	-29.3188
	84.4	-34.6561
	84.5	-33.3434
	84.6	-40.5202
	84.7	-56.9096
	84.8	-56.526
	84.9	-19.1789
	85	-43.3513
	85.1	-19.2999
	85.2	-34.056
	85.3	-23.0605
	85.4	-22.8156
	85.5	-19.537
	85.6	-26.4704
	85.7	-45.1798
	85.8	-35.3139
	85.9	-27.4177
	86	-27.6561
	86.1	-57.9444
	86.2	-37.0548
	86.3	-59.7032
	86.4	-41.6093
	86.5	-30.2441
	86.6	-28.5826
	86.7	-33.1292
	86.8	-52.4033
	86.9	-48.7299
	87	-35.9361
	87.1	-48.5126
	87.2	-65.876
	87.3	-79.581
	87.4	-54.3998
	87.5	-43.7832
	87.6	-45.4503
	87.7	-60.151
	87.8	-57.9918
	87.9	-51.2625
	88	-29.0481
	88.1	-23.7255
	88.2	-28.0014
	88.3	-34.1979
	88.4	-23.0094
	88.5	-60.4768
	88.6	-44.7791
	88.7	-27.325
	88.8	-43.6143
	88.9	-48.8349
	89	-57.4552
	89.1	-49.001
	89.2	-59.5893
	89.3	-70.5387
	89.4	-58.8486
	89.5	-40.0387
	89.6	-44.4036
	89.7	-62.0437
	89.8	-51.9944
	89.9	-36.372
	90	-55.4631
	90.1	-64.6836
	90.2	-58.7033
	90.3	-48.6549
	90.4	-22.5929
	90.5	-22.7534
	90.6	-17.0512
	90.7	-31.9176
	90.8	-23.8705
	90.9	-30.6711
	91	-44.8013
	91.1	-31.066
	91.2	-49.4932
	91.3	-31.3919
	91.4	-31.154
	91.5	-25.797
	91.6	-11.5346
	91.7	-14.5725
	91.8	-36.0167
	91.9	-31.6537
	92	-27.8943
	92.1	-40.4868
	92.2	-40.0352
	92.3	-39.9808
	92.4	-17.2484
	92.5	-23.381
	92.6	-30.6327
	92.7	-19.1818
	92.8	-37.1374
	92.9	-14.9851
	93	-38.1658
	93.1	-33.7128
	93.2	-37.73
	93.3	-45.0746
	93.4	-37.2564
	93.5	-44.0862
	93.6	-33.7632
	93.7	-37.4799
	93.8	-43.9257
	93.9	-30.6077
	94	-24.7336
	94.1	-34.5668
	94.2	-30.9305
	94.3	-47.6189
	94.4	-32.111
	94.5	-38.1322
	94.6	-39.9889
	94.7	-39.9756
	94.8	-36.9861
	94.9	-42.3992
	95	-36.6612
	95.1	-54.9674
	95.2	-28.3373
	95.3	-43.2312
	95.4	-51.0674
	95.5	-55.0755
	95.6	-36.8276
	95.7	-45.4717
	95.8	-48.0441
	95.9	-58.783
	96	-69.3653
	96.1	-54.3935
	96.2	-58.9983
	96.3	-39.0835
	96.4	-47.2453
	96.5	-48.8458
	96.6	-49.2391
	96.7	-40.9566
	96.8	-39.6307
	96.9	-21.4355
	97	-21.9758
	97.1	-34.4777
	97.2	-42.6844
	97.3	-39.1851
	97.4	-38.5279
	97.5	-30.2534
	97.6	-30.5674
	97.7	-28.6745
	97.8	-26.3358
	97.9	-19.0073
	98	-22.9859
	98.1	-13.5004
	98.2	-12.1612
	98.3	-18.6636
	98.4	-25.3914
	98.5	-37.0761
	98.6	-32.728
	98.7	-36.5865
	98.8	-41.7063
	98.9	-46.1904
	99	-30.5811
	99.1	-28.372
	99.2	-18.3214
	99.3	-31.3218
	99.4	-32.1075
	99.5	-29.8075
	99.6	-30.4933
	99.7	-32.4415
	99.8	-23.8281
	99.9	-34.0734
	100

## Sheet: Fig.6e
	x	y
	Site	ΔE (kcal/mol)
	D314	-5.57541
	S316	-3.60452
	R317	-1.4396
	H385	0.015283
	R392	-5.0181
	D424	-5.17425
	E425	-14.9849
	G429	-0.20518
	K430	1.12679
	G431	-0.22643
	T435	-0.41215
	K436	-0.90614

## Sheet: Fig.7c
	x	y
	d3 (Å)	ΔG (kcal/mol)
	5	10.9603
	5.1	10.3771
	5.2	9.82276
	5.3	9.29723
	5.4	8.80053
	5.5	8.33265
	5.6	7.8936
	5.7	7.49504
	5.8	7.12597
	5.9	6.78197
	6	6.46531
	6.1	6.18863
	6.2	5.93931
	6.3	5.7022
	6.4	5.4658
	6.5	5.224
	6.6	4.98042
	6.7	4.7243
	6.8	4.46173
	6.9	4.21638
	7	4.02446
	7.1	3.89372
	7.2	3.84354
	7.3	3.86876
	7.4	3.94307
	7.5	4.04513
	7.6	4.16265
	7.7	4.2753
	7.8	4.36801
	7.9	4.44558
	8	4.51197
	8.1	4.57624
	8.2	4.63302
	8.3	4.675
	8.4	4.71006
	8.5	4.74405
	8.6	4.77229
	8.7	4.79399
	8.8	4.82292
	8.9	4.84766
	9	4.86381
	9.1	4.88272
	9.2	4.90508
	9.3	4.93609
	9.4	4.99026
	9.5	5.06134
	9.6	5.14109
	9.7	5.23391
	9.8	5.3338
	9.9	5.43117
	10	5.52173
	10.1	5.58705
	10.2	5.62446
	10.3	5.64167
	10.4	5.63704
	10.5	5.61106
	10.6	5.56964
	10.7	5.51821
	10.8	5.46144
	10.9	5.4084
	11	5.36022
	11.1	5.31756
	11.2	5.27531
	11.3	5.23534
	11.4	5.19298
	11.5	5.13879
	11.6	5.07036
	11.7	4.98044
	11.8	4.86906
	11.9	4.74743
	12	4.61753
	12.1	4.48032
	12.2	4.33909
	12.3	4.21139
	12.4	4.08668
	12.5	3.97016
	12.6	3.85706
	12.7	3.74966
	12.8	3.64805
	12.9	3.55226
	13	3.47325
	13.1	3.41241
	13.2	3.36118
	13.3	3.32429
	13.4	3.3136
	13.5	3.3273
	13.6	3.35702
	13.7	3.39375
	13.8	3.41827
	13.9	3.4325
	14	3.42038
	14.1	3.37938
	14.2	3.30572
	14.3	3.19105
	14.4	3.05198
	14.5	2.9048
	14.6	2.76591
	14.7	2.63276
	14.8	2.50795
	14.9	2.37687
	15	2.25114
	15.1	2.15182
	15.2	2.04875
	15.3	1.94612
	15.4	1.83304
	15.5	1.73286
	15.6	1.64072
	15.7	1.52857
	15.8	1.40434
	15.9	1.25644
	16	1.07551
	16.1	0.88304
	16.2	0.71137
	16.3	0.5541
	16.4	0.39579
	16.5	0.28181
	16.6	0.18883
	16.7	0.11686
	16.8	0.0659
	16.9	0.03595
	17	0

[truncated: 13 more sheets: Fig.8a, Fig.8c, Supplementary Fig.2, Supplementary Fig.3a, Supplementary Fig.3c, Supplementary Fig. 5a, Supplementary Fig. 5b, Supplementary Fig. 11 , Supplementary Fig. 12, Supplementary Fig. 14, Supplementary Fig. 17, Supplementary Table 10, Supplementary Table 11]
